# Supplementary material for: TsOH-mediated reaction of aziridinofullerene with diols for the preparation of fullerene-fused dioxygenated ring compounds
Source: Royal Society of Chemistry journal article supplement (doi:10.1039/c5ra03751d), 2015-01-01

## Electronic Supplementary Information

### TsOH-mediated reaction of aziridinofullerene with diols for the preparation of fullerene-fused dioxxygenated ring compounds

Jun Wu, Fa-Bao Li,\* Xiao-Feng Zhang, Ji-Long Shi and Li Liu\*

*Hubei Collaborative Innovation Center for Advanced Organic Chemical Materials,  
Ministry of Education Key Laboratory for the Synthesis and Application of Organic  
Functional Molecules, and School of Chemistry and Chemical Engineering, Hubei*

*University, Wuhan 430062, P. R. China*

*lfb0615@hubu.edu.cn and liulihubei@hubu.edu.cn*

|                                                           |         |
|-----------------------------------------------------------|---------|
| Typical MALDI-TOF MS of C <sub>60</sub> -fused dioxanes   | S2      |
| Typical MALDI-TOF MS of C <sub>60</sub> -fused dioxepanes | S3      |
| Typical MALDI-TOF MS of C <sub>60</sub> -fused dioxocanes | S4      |
| <sup>1</sup> H NMR spectrum of compound <b>3a</b>         | S5      |
| <sup>1</sup> H NMR spectrum of compound <b>3b</b>         | S6      |
| <sup>13</sup> C NMR spectrum of compound <b>3b</b>        | S7-S8   |
| <sup>1</sup> H NMR spectrum of compound <b>3c</b>         | S9      |
| <sup>13</sup> C NMR spectrum of compound <b>3c</b>        | S10-S11 |
| <sup>1</sup> H NMR spectrum of compound <b>3d</b>         | S12     |
| <sup>1</sup> H NMR spectrum of compound <b>3e</b>         | S13     |
| <sup>1</sup> H NMR spectrum of compound <b>3f</b>         | S14     |
| <sup>13</sup> C NMR spectrum of compound <b>3f</b>        | S15-S16 |
| <sup>1</sup> H NMR spectrum of compound <b>3g</b>         | S17     |
| <sup>13</sup> C NMR spectrum of compound <b>3g</b>        | S18-S19 |
| <sup>1</sup> H NMR spectrum of compound <b>3h</b>         | S20     |
| <sup>13</sup> C NMR spectrum of compound <b>3h</b>        | S21-S22 |
| <sup>1</sup> H NMR spectrum of compound <b>3i</b>         | S23     |
| <sup>13</sup> C NMR spectrum of compound <b>3i</b>        | S24-S25 |
| <sup>1</sup> H NMR spectrum of compound <b>3j</b>         | S26     |
| <sup>13</sup> C NMR spectrum of compound <b>3j</b>        | S27-S28 |
| <sup>1</sup> H NMR spectrum of compound <b>3k</b>         | S29     |
| <sup>13</sup> C NMR spectrum of compound <b>3k</b>        | S30-S31 |

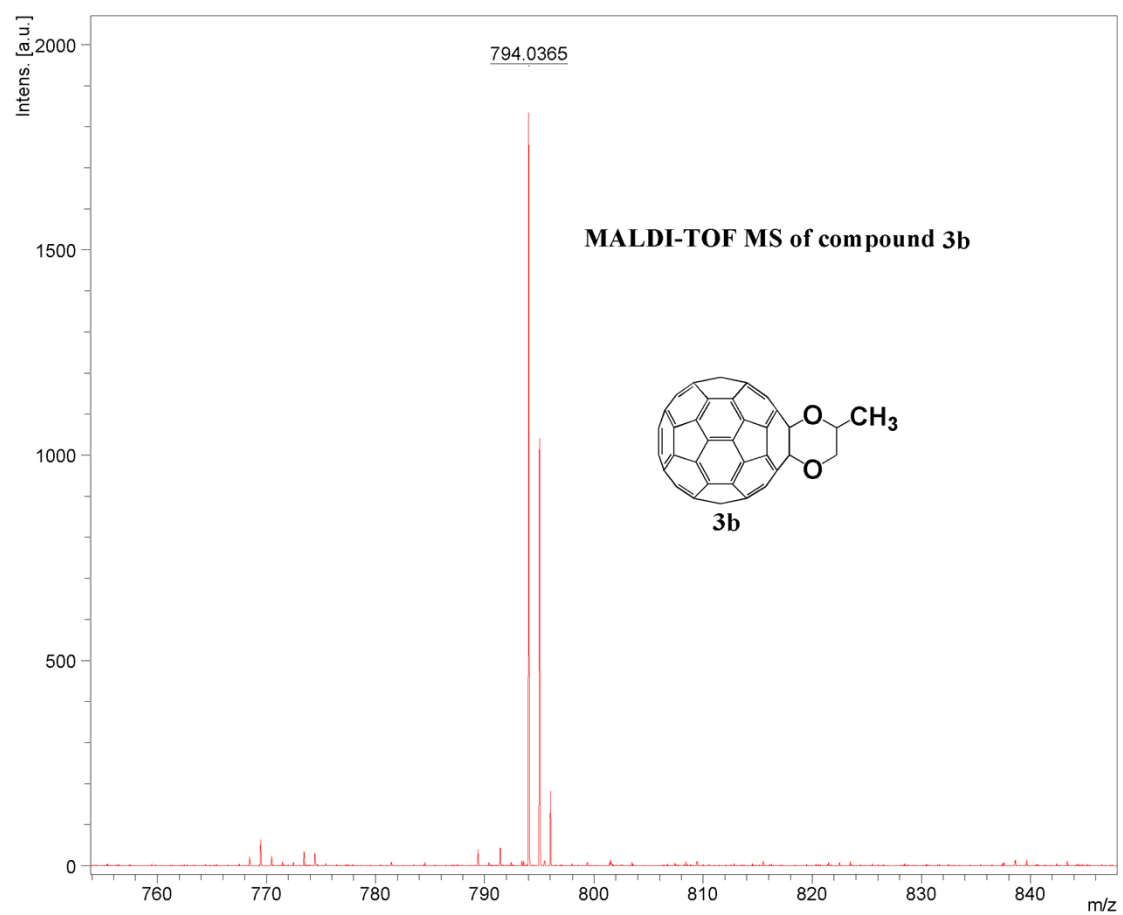

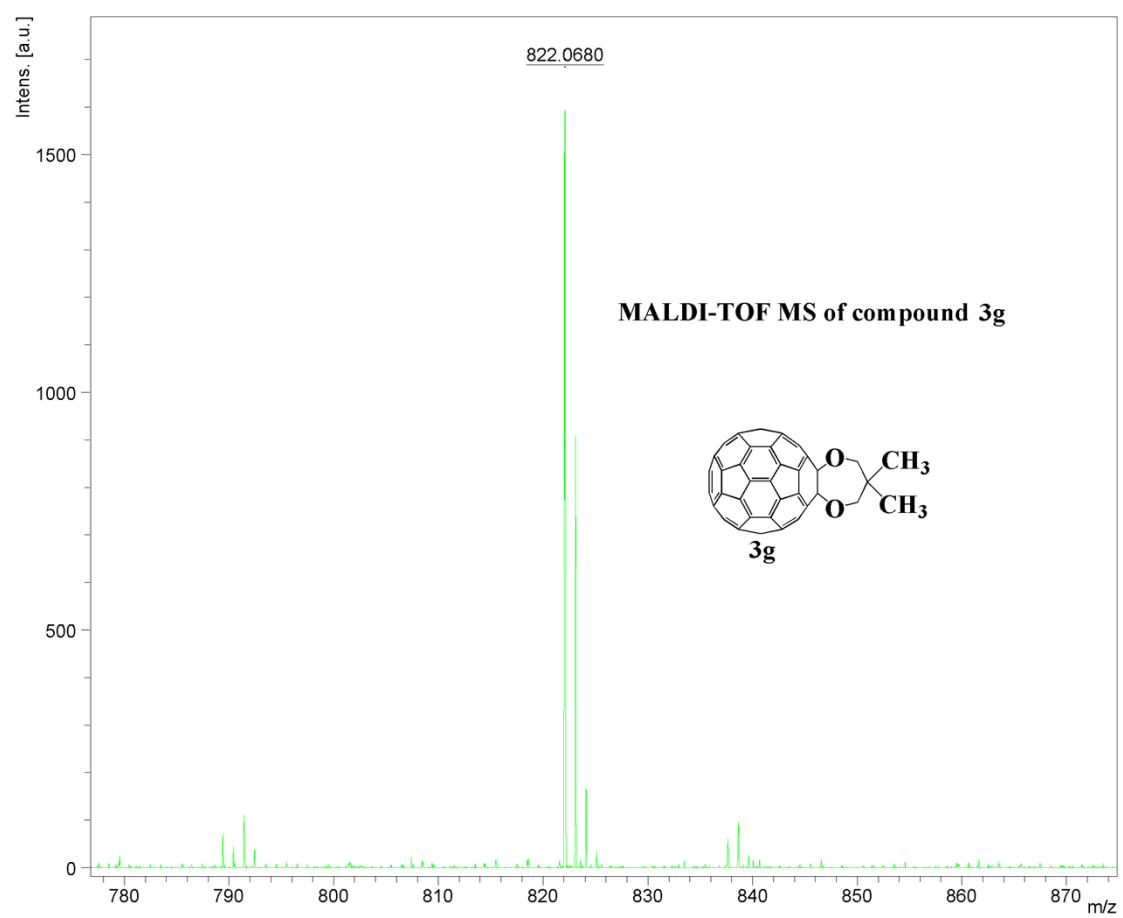

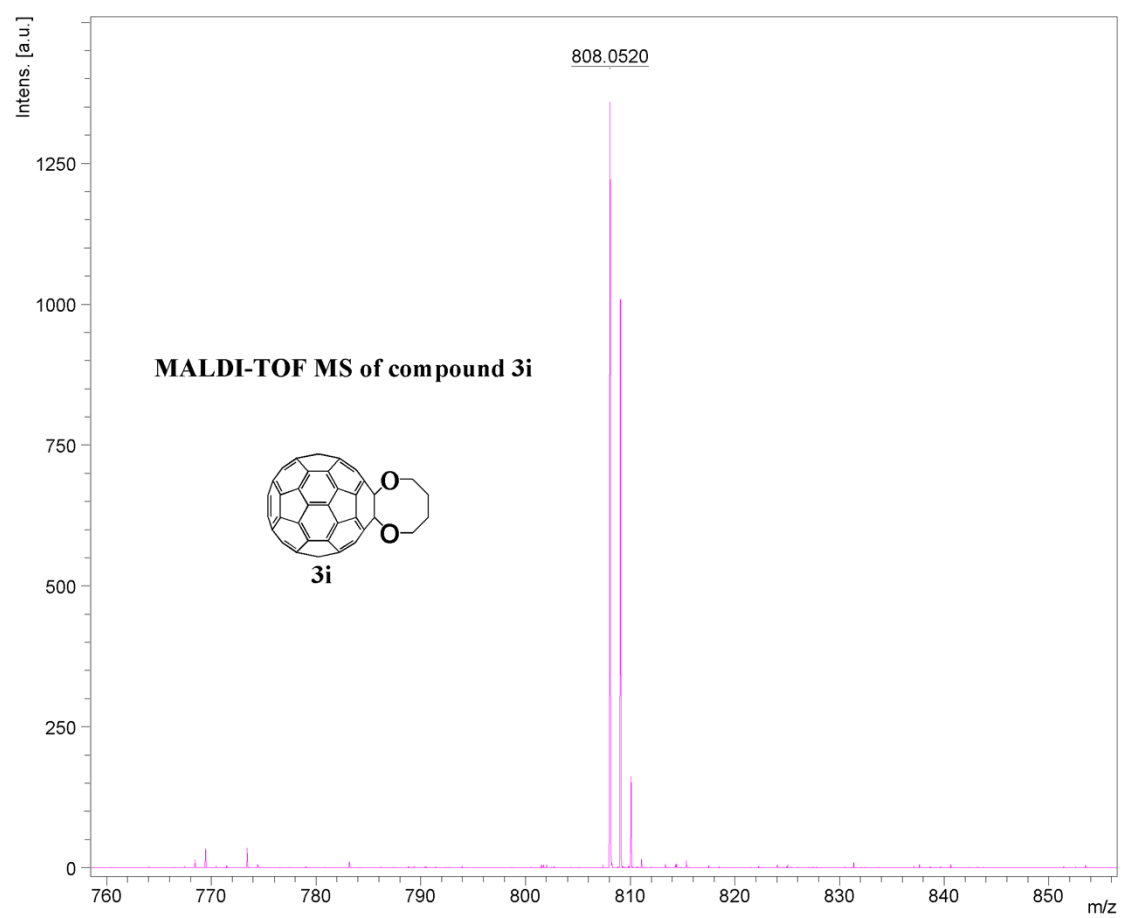

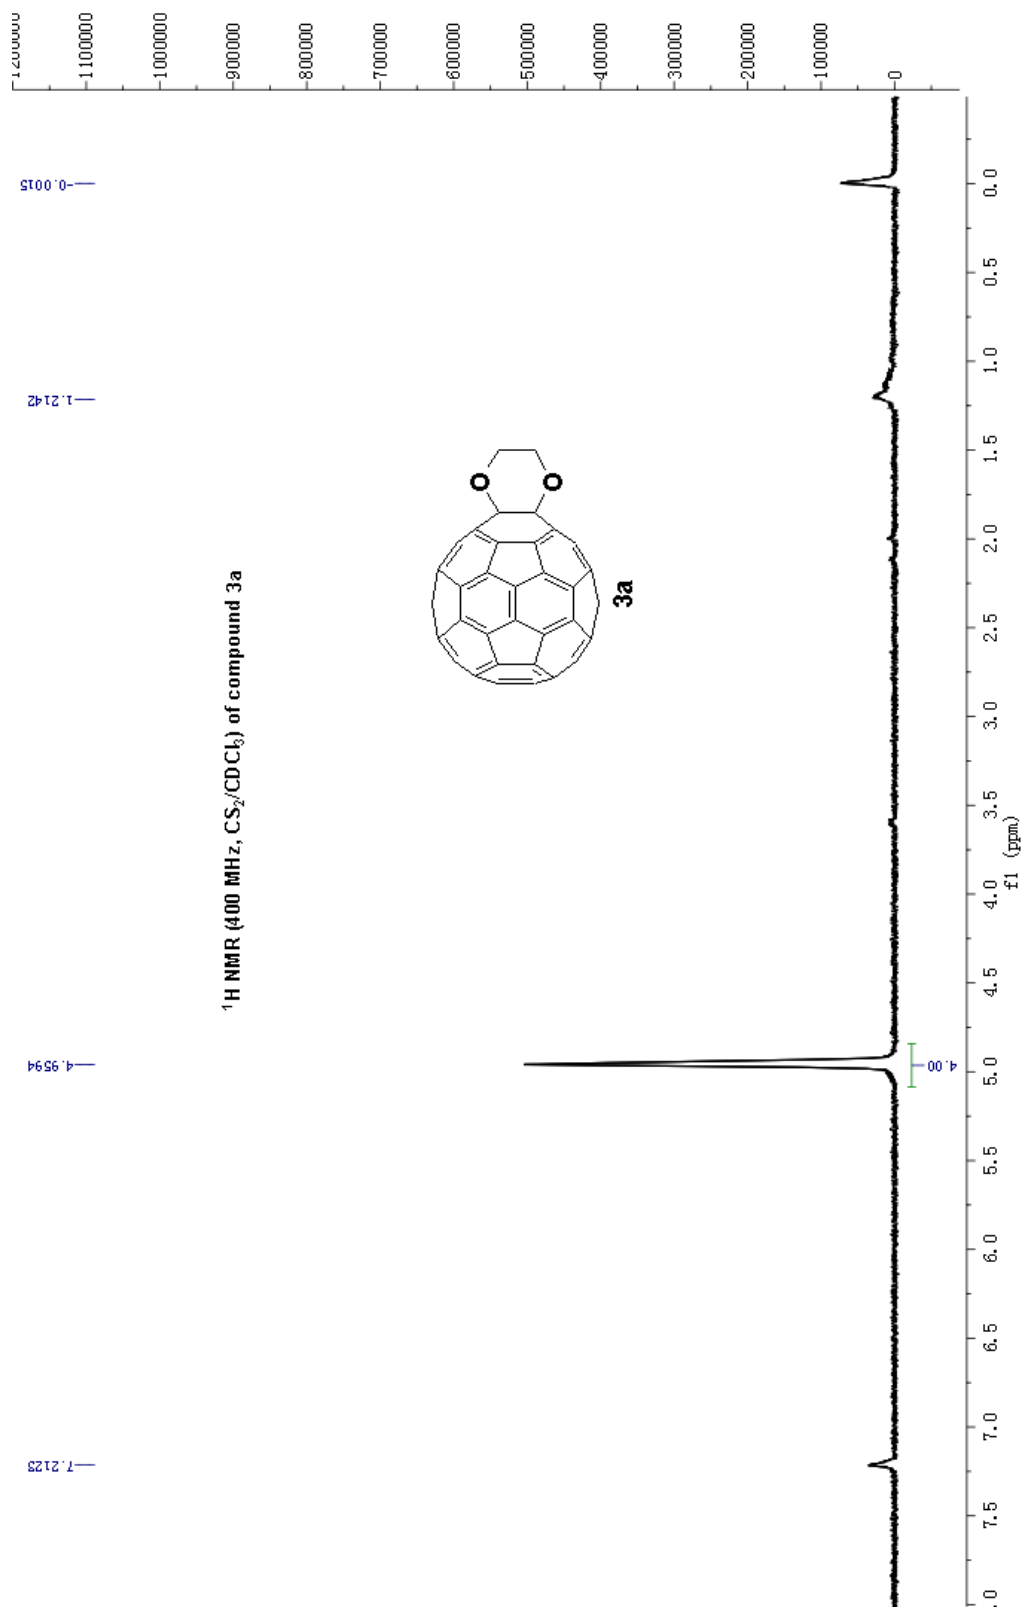

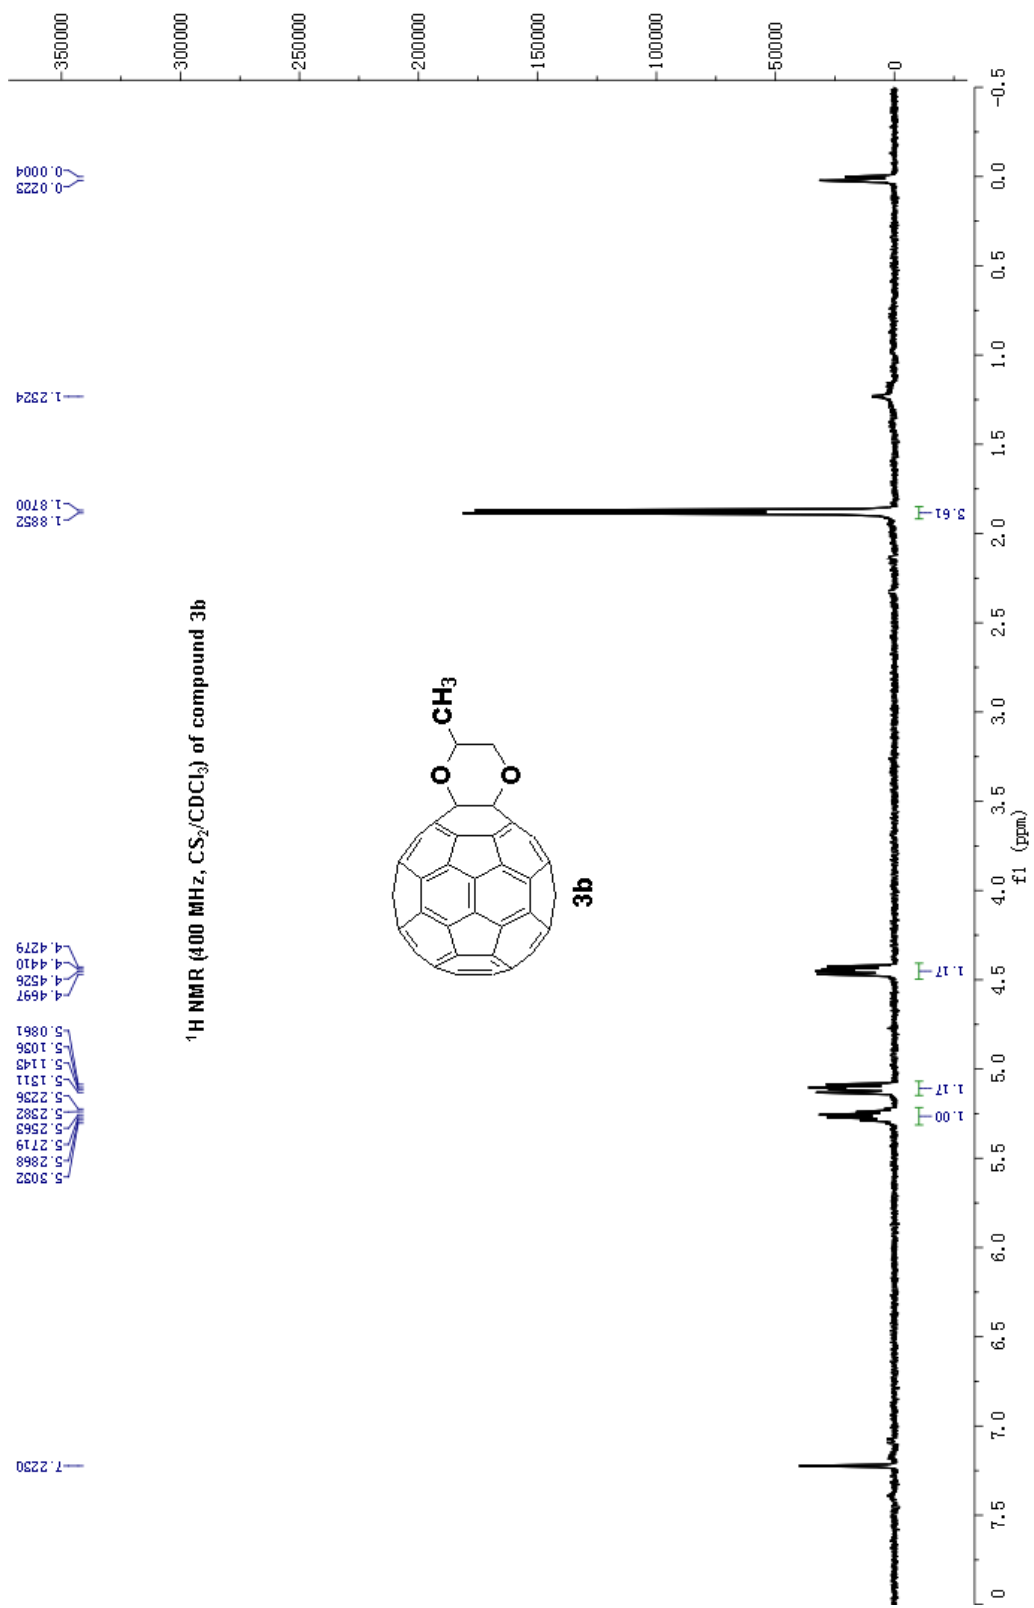

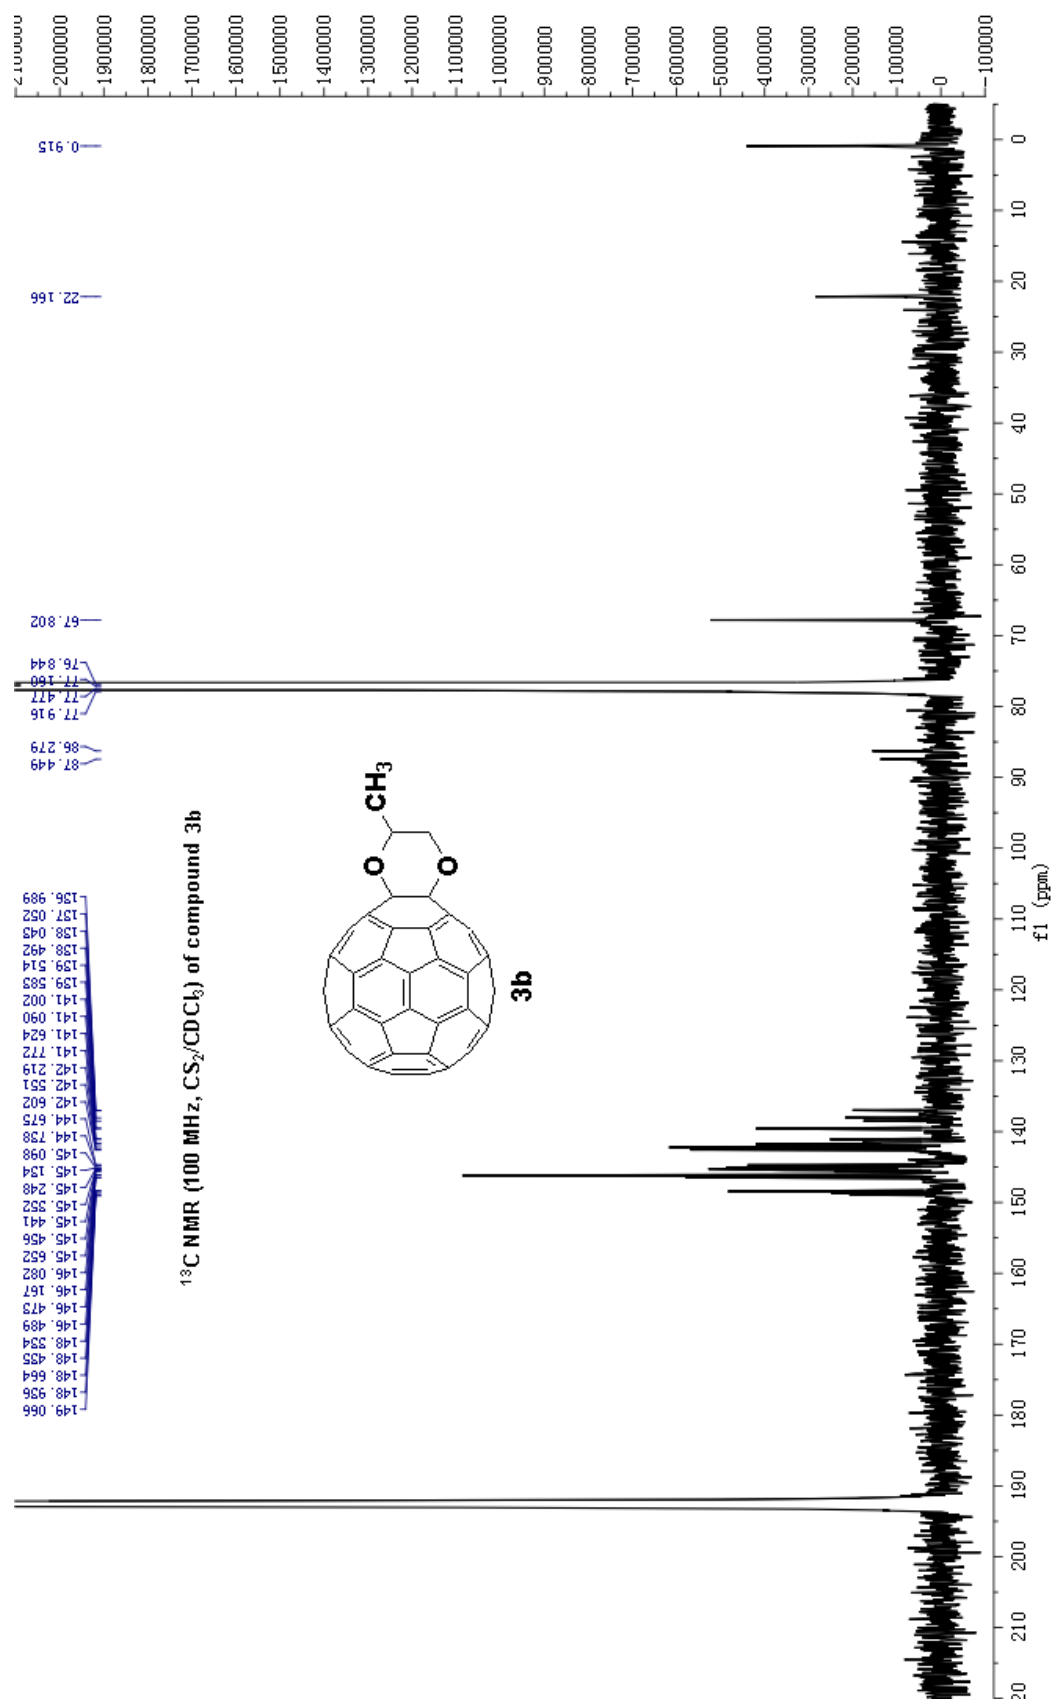

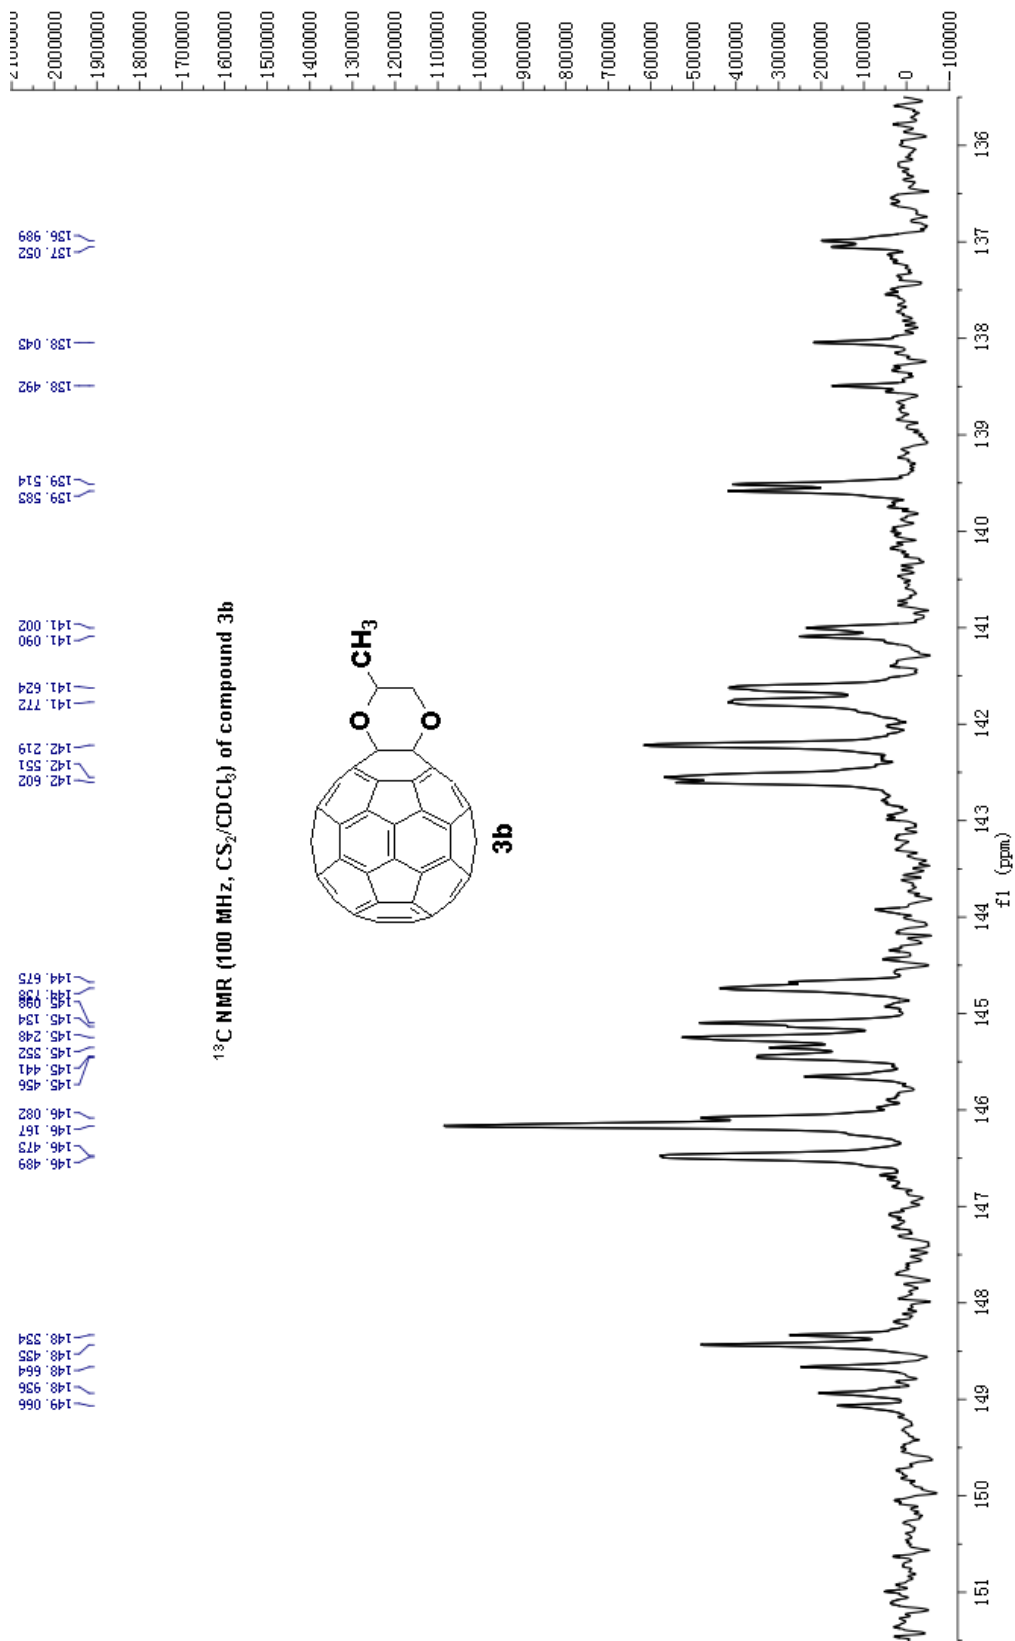



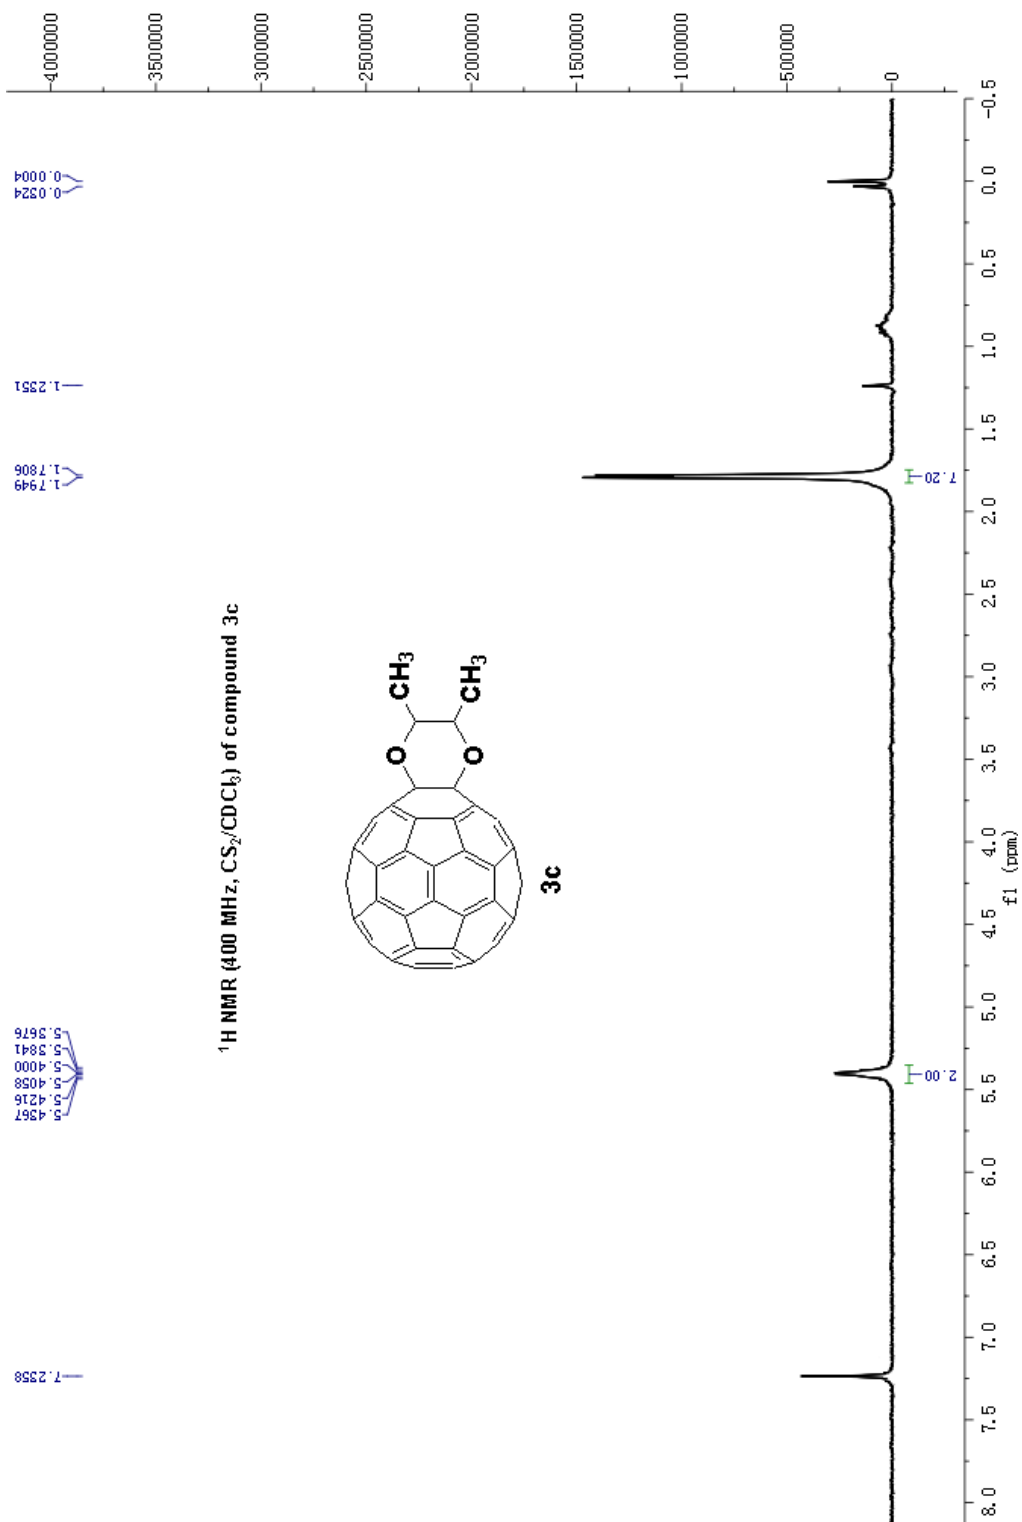

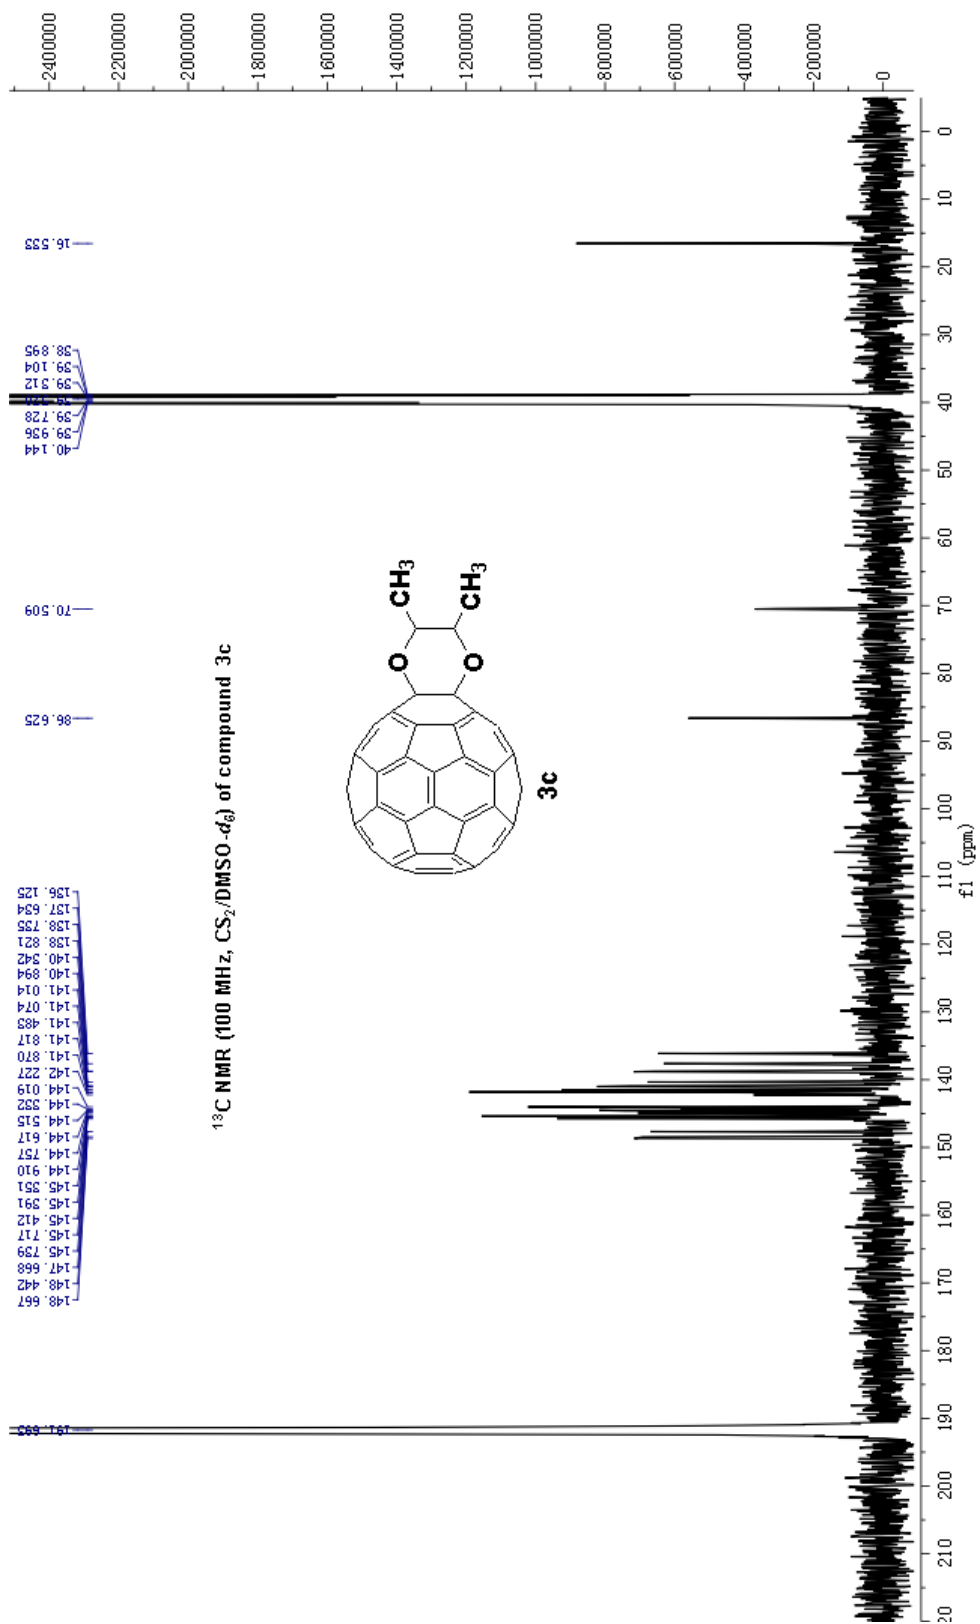

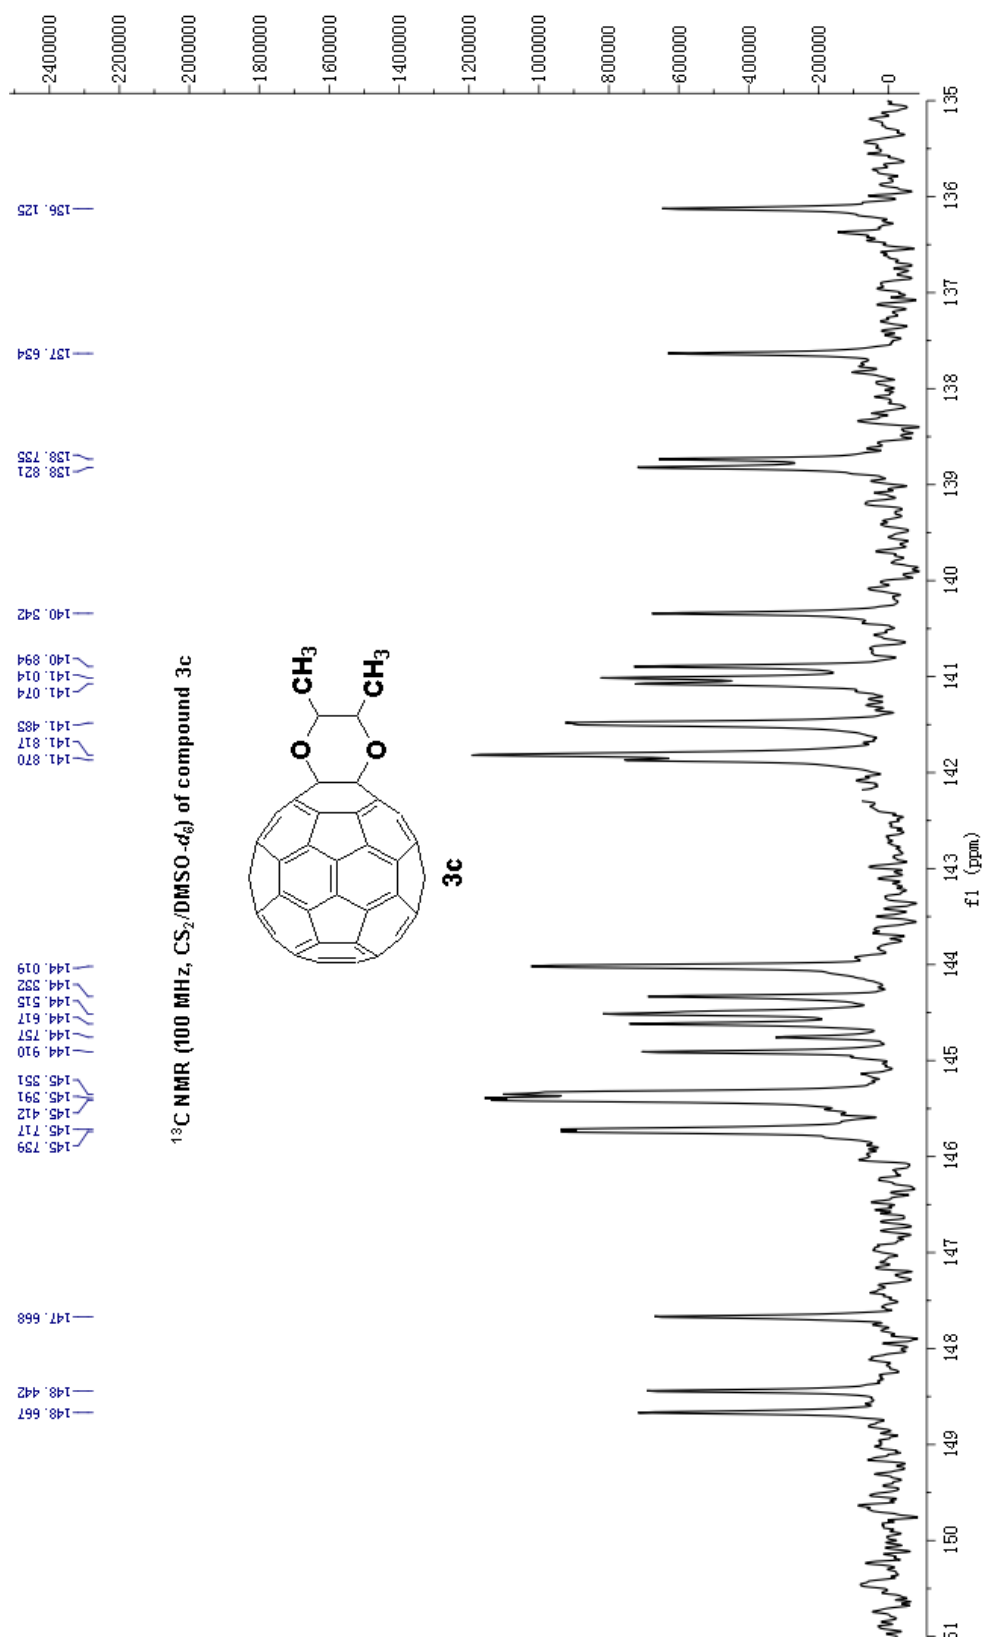

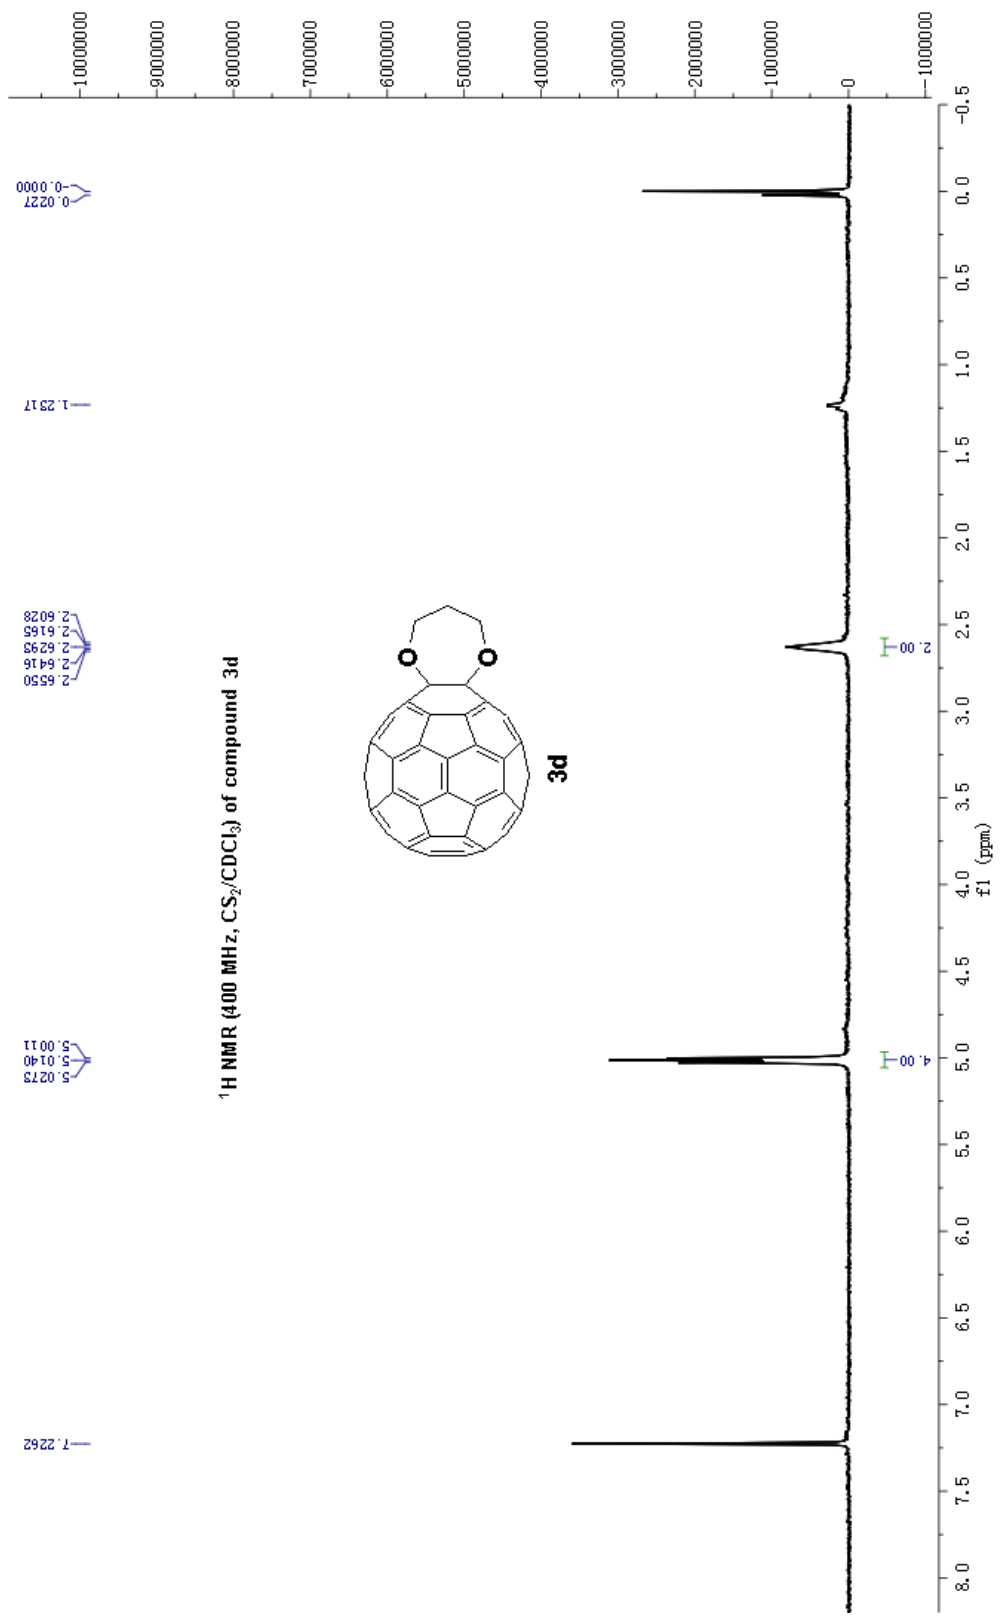

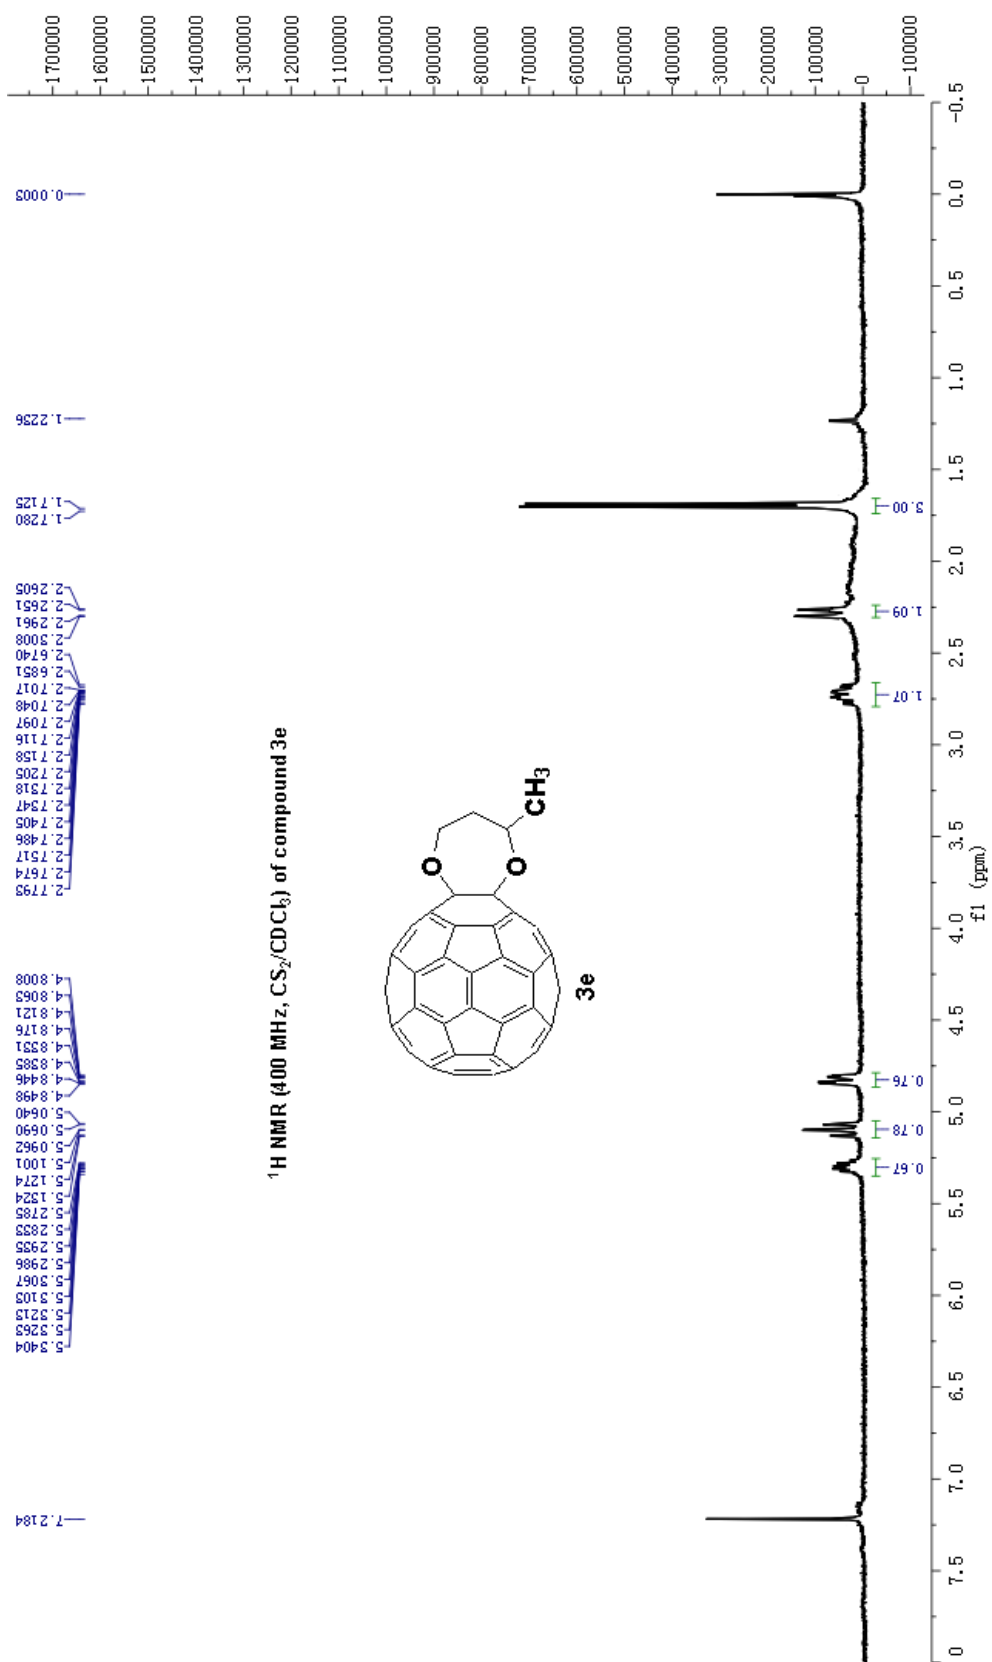

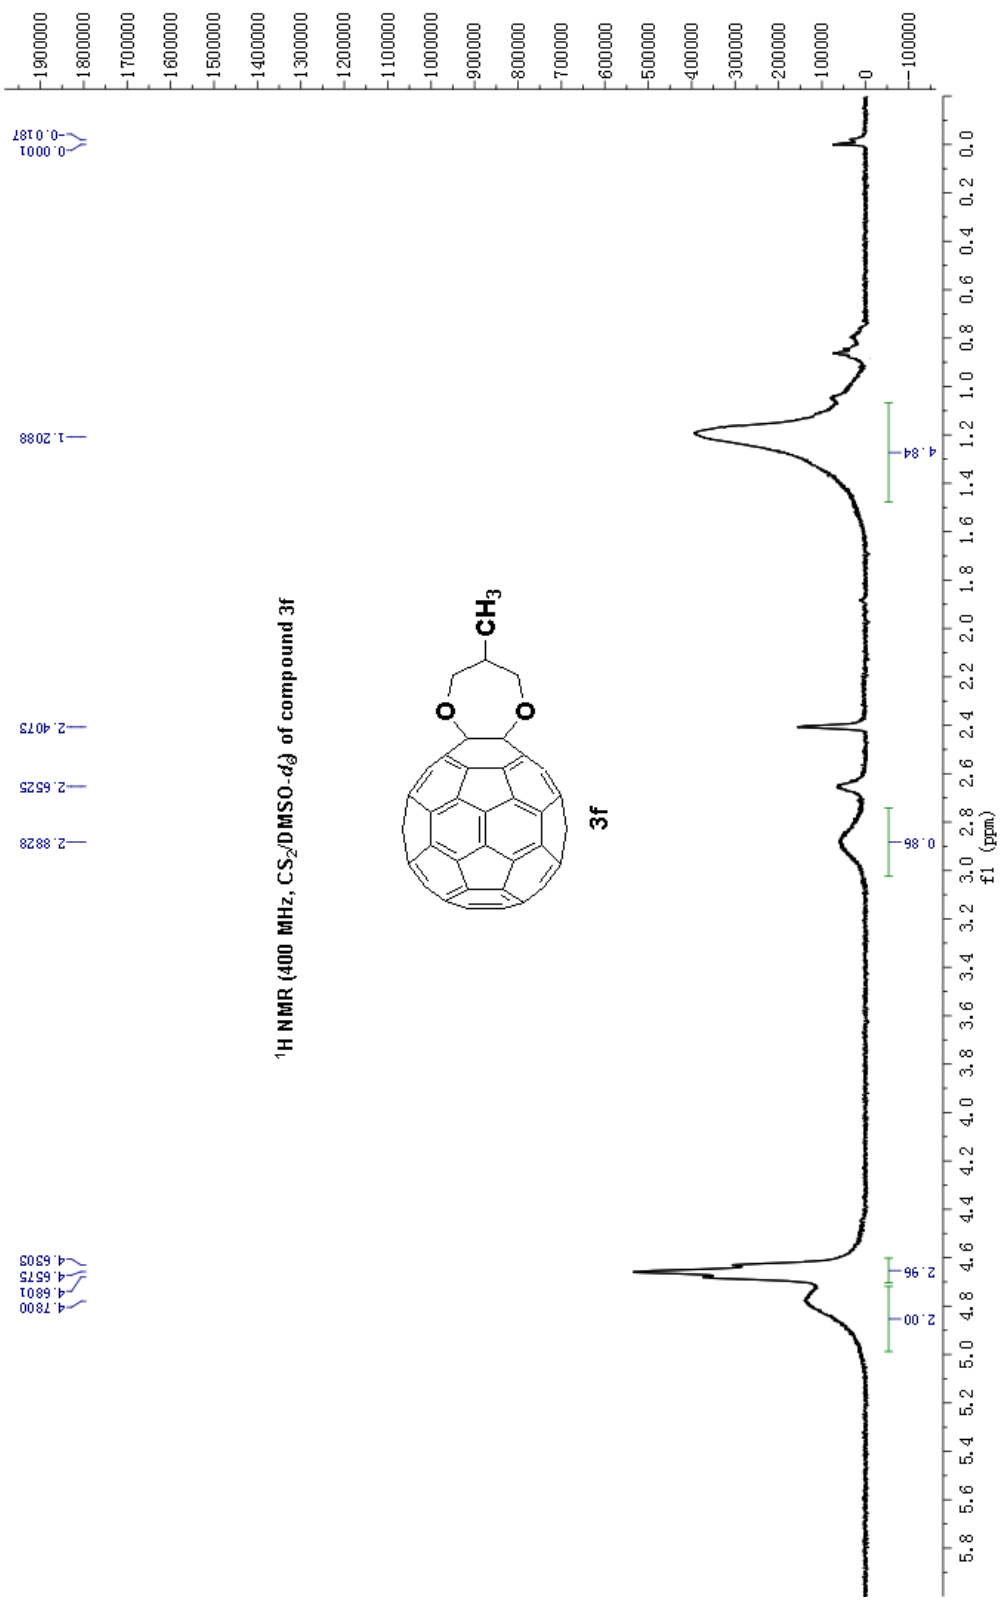

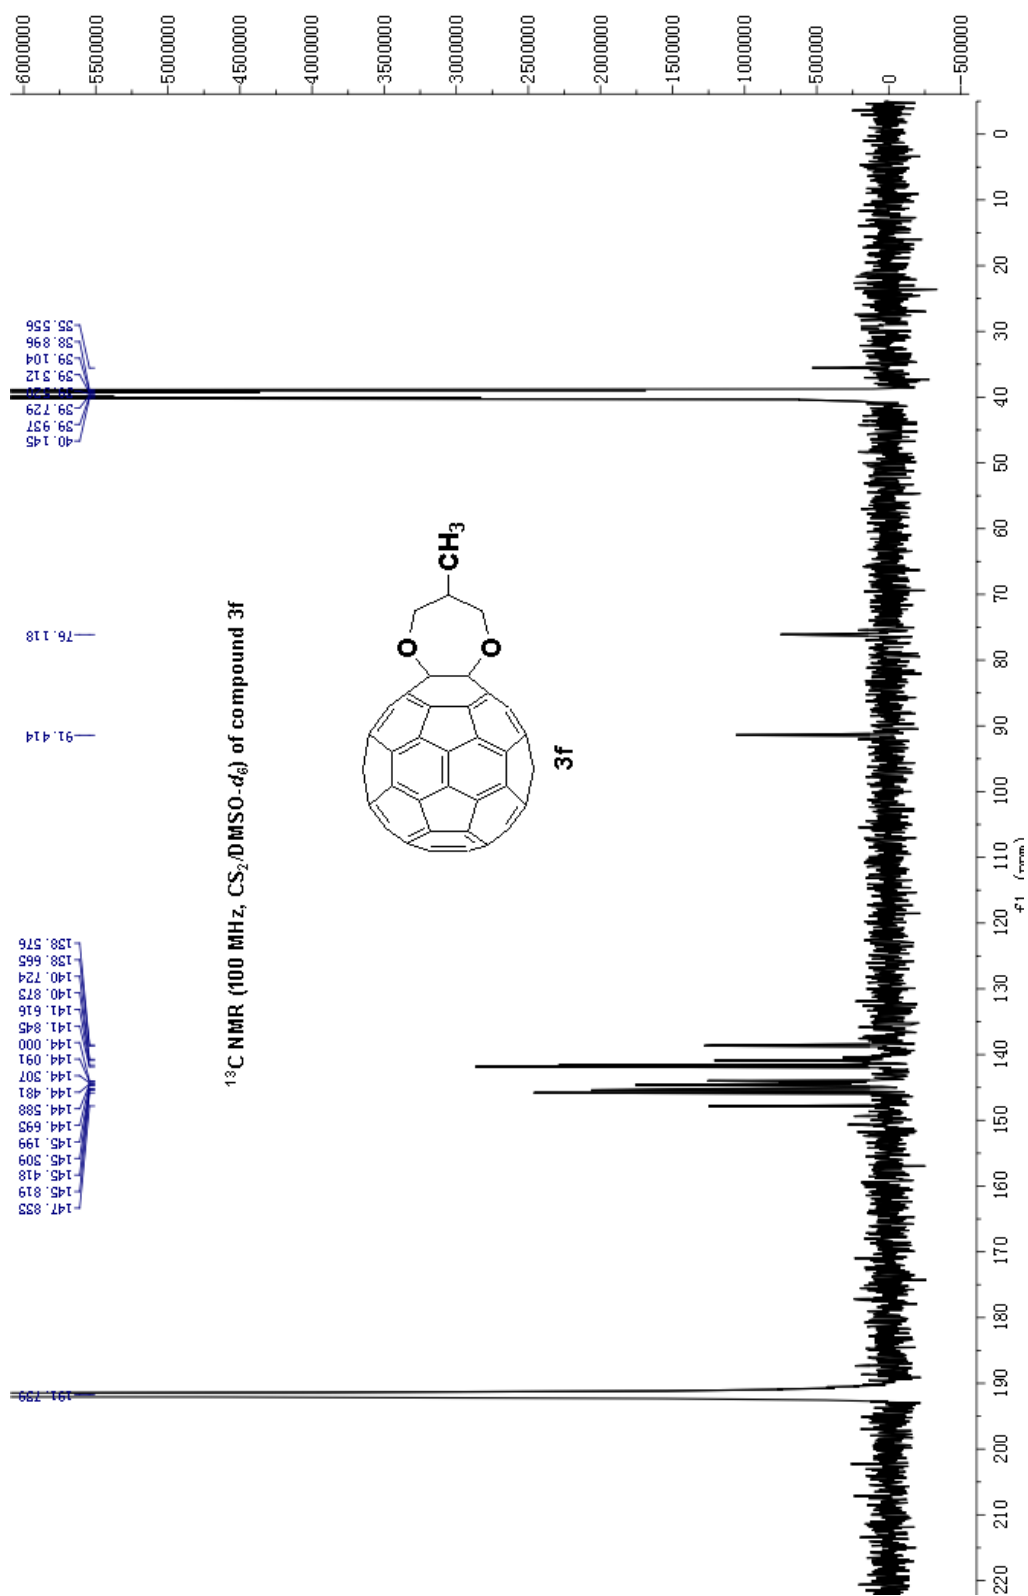

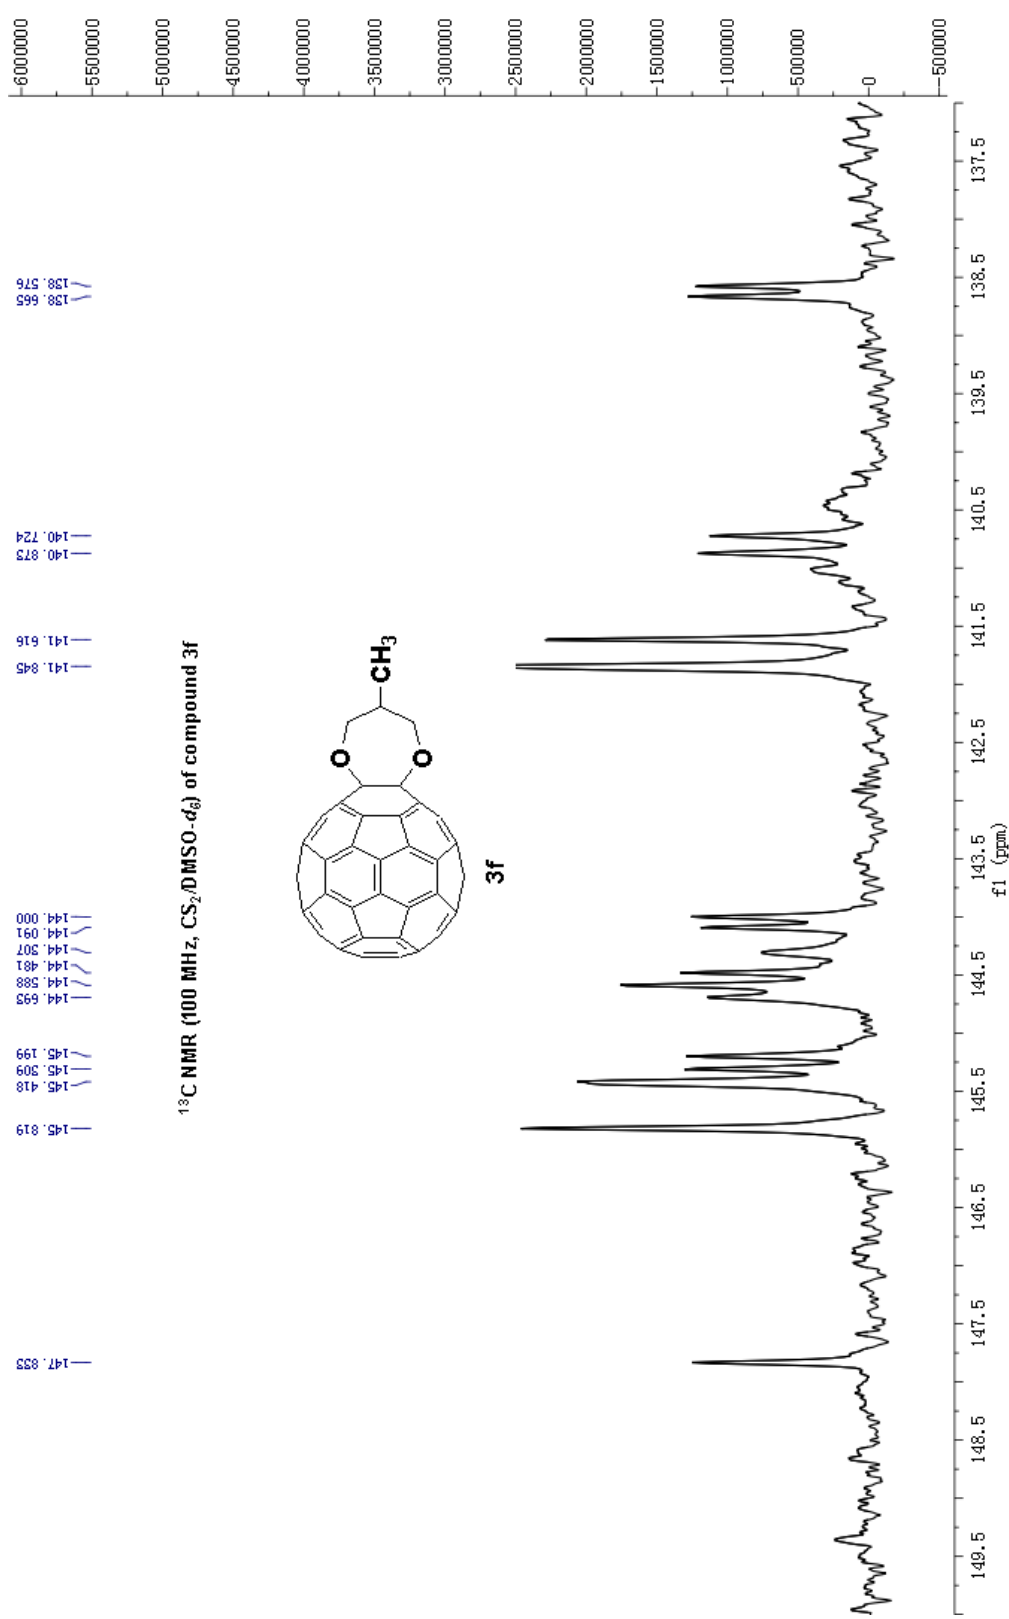



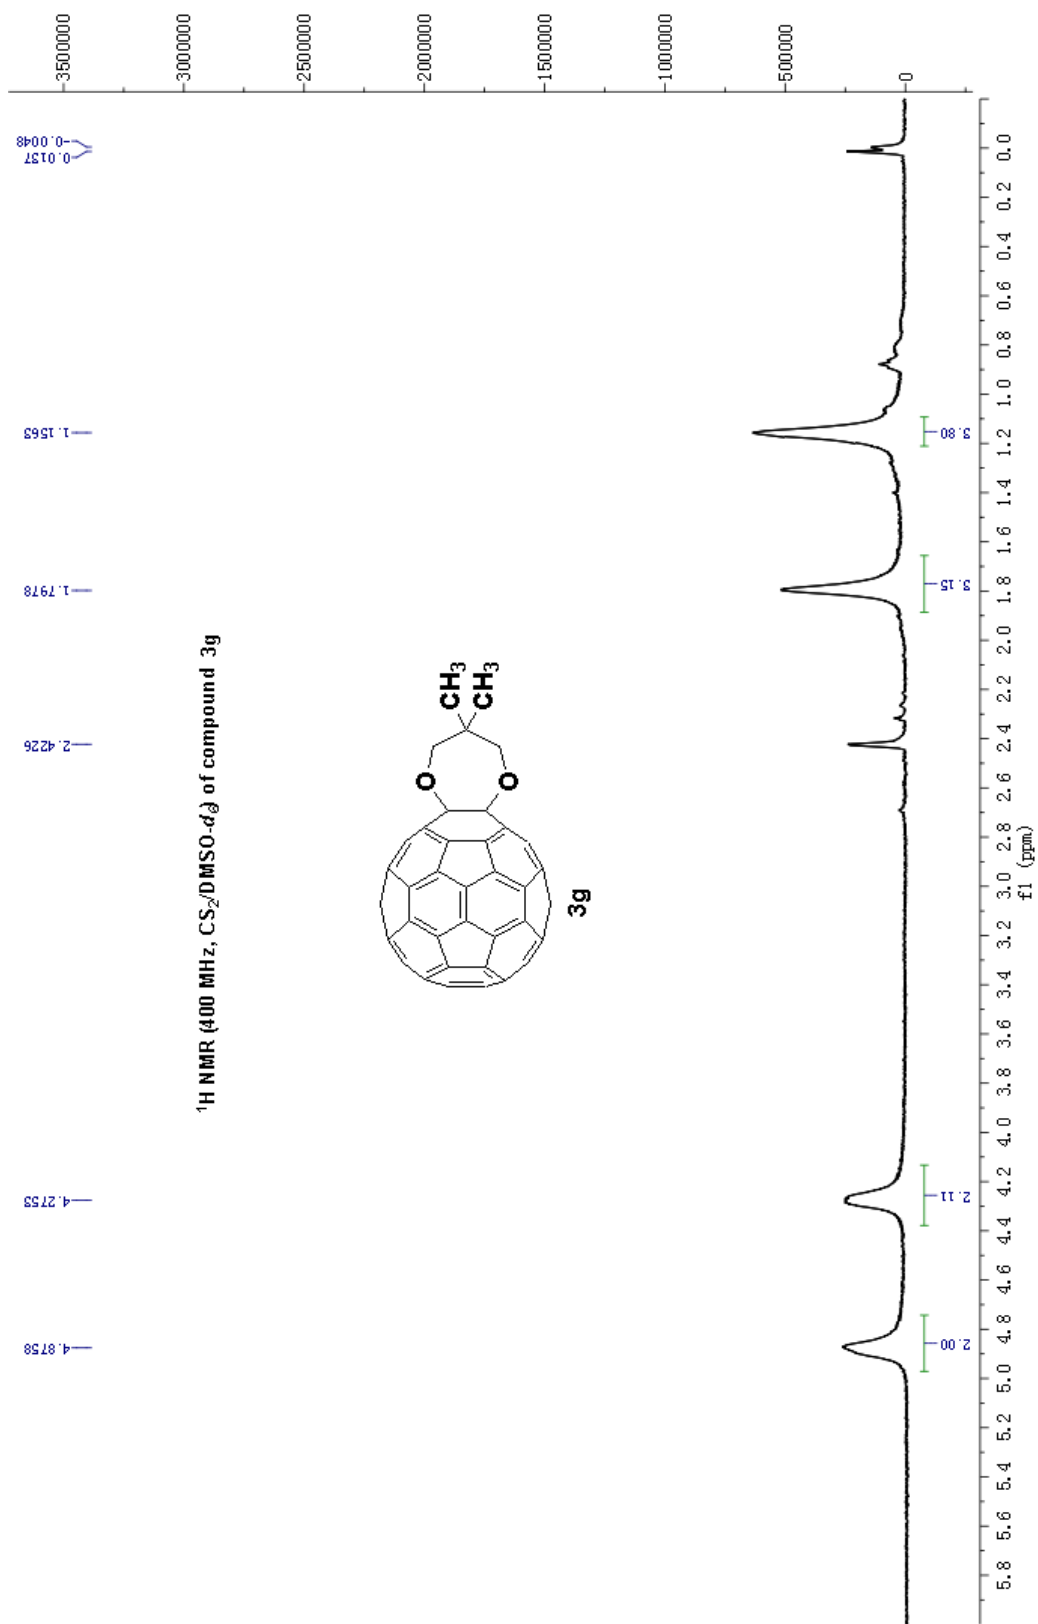

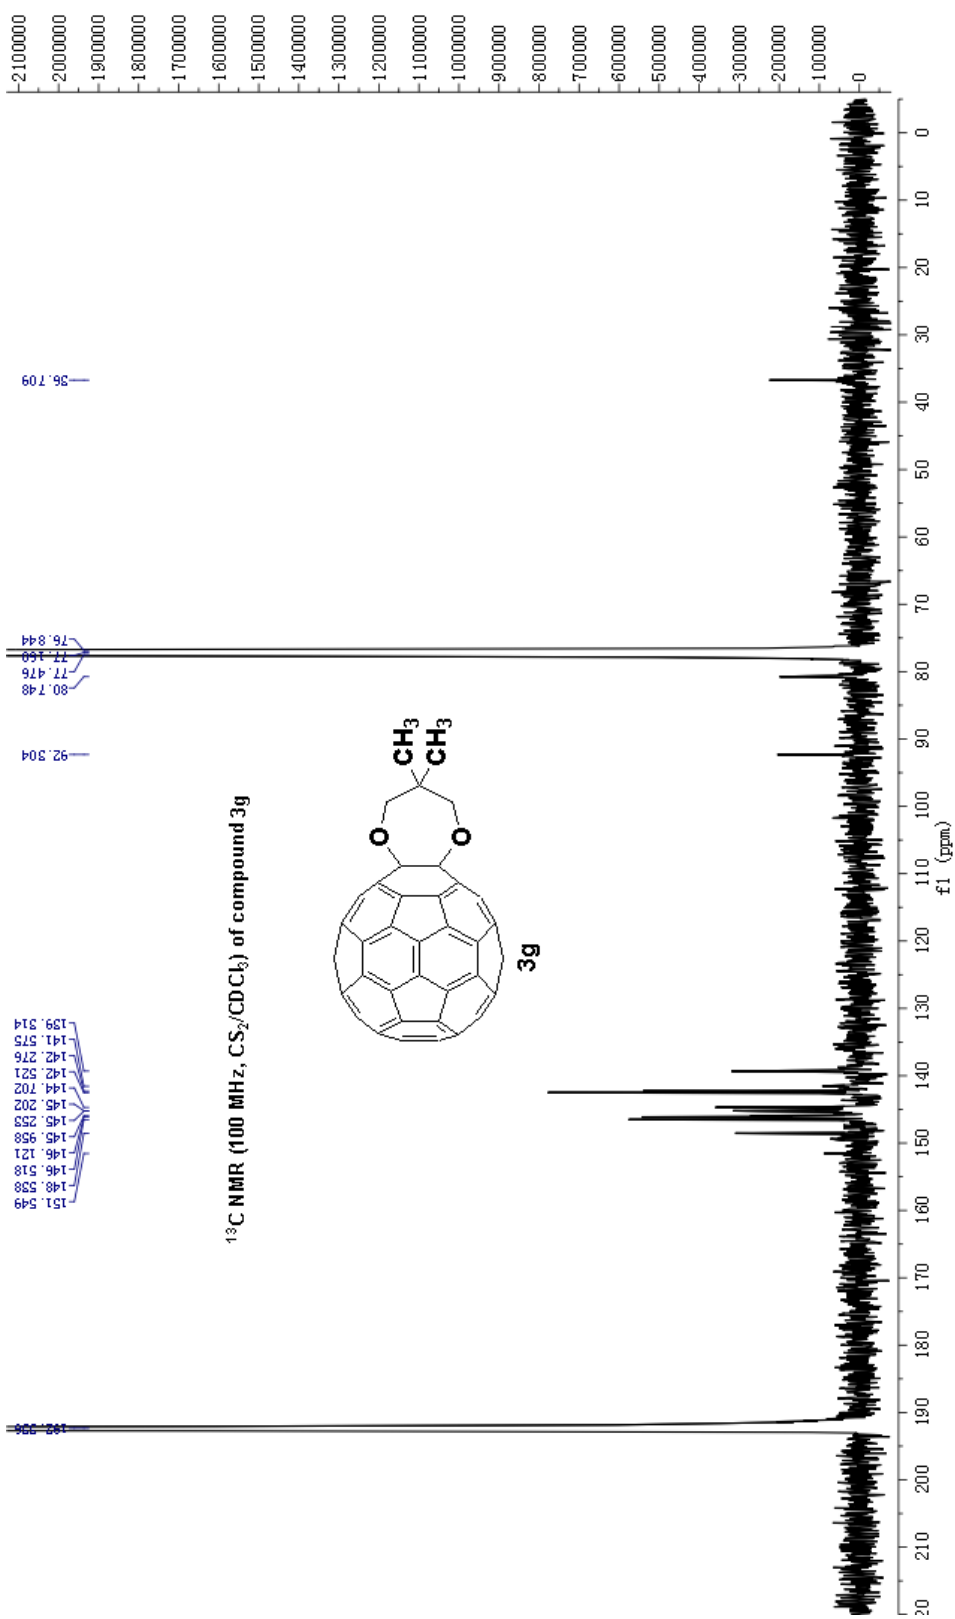

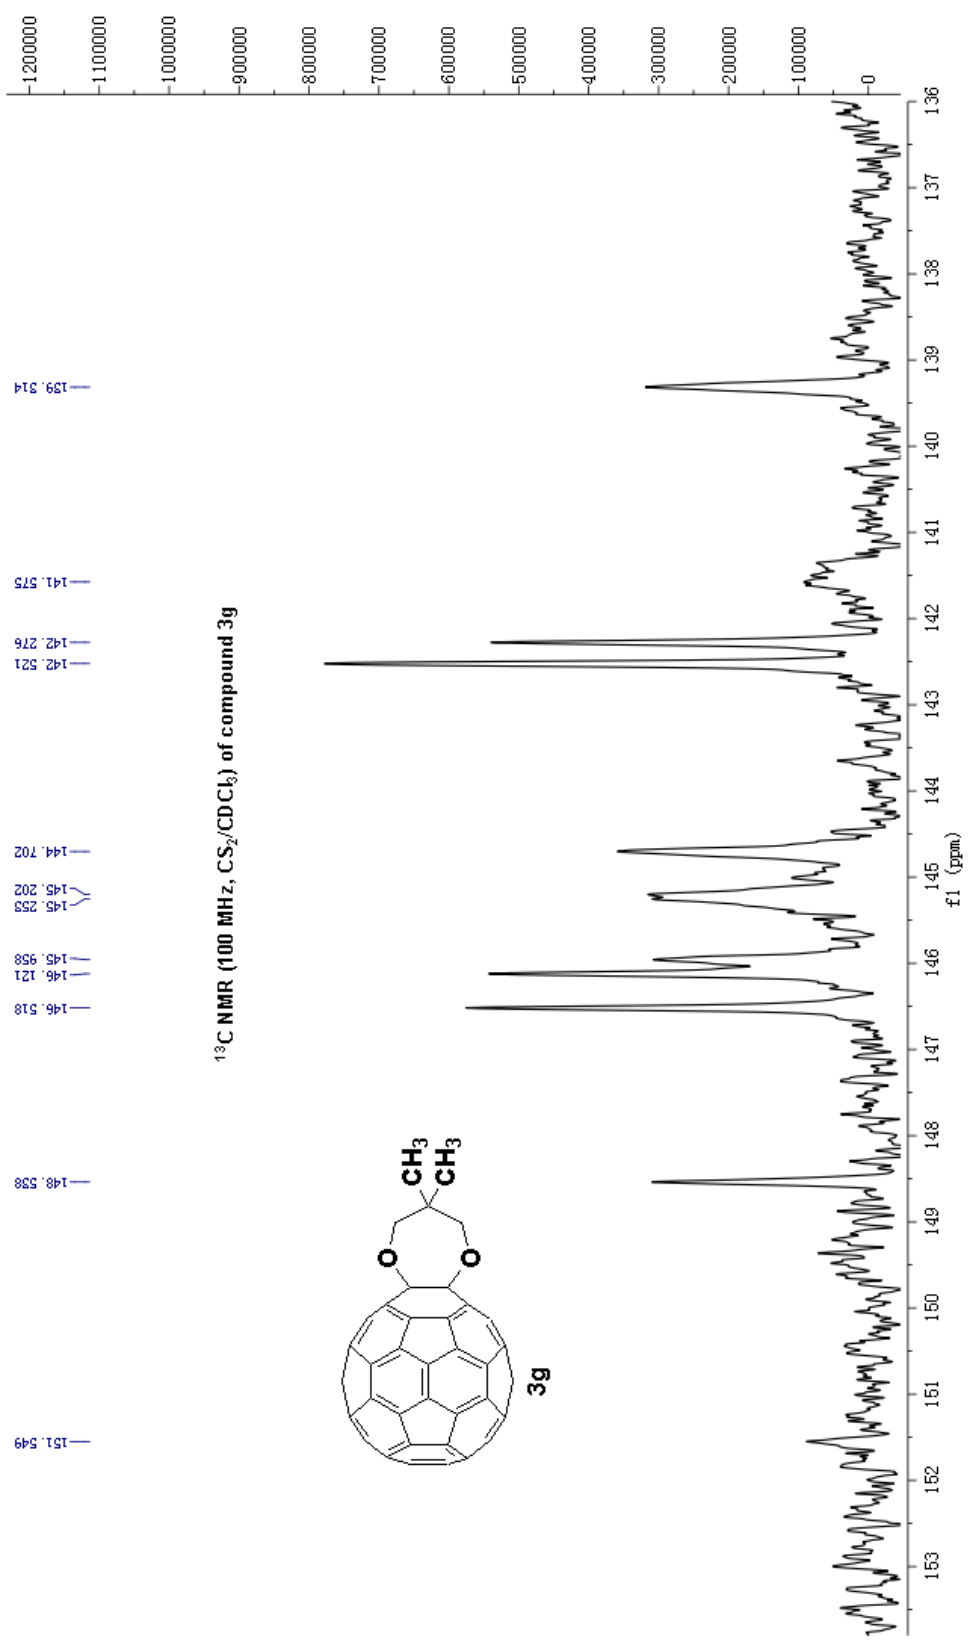

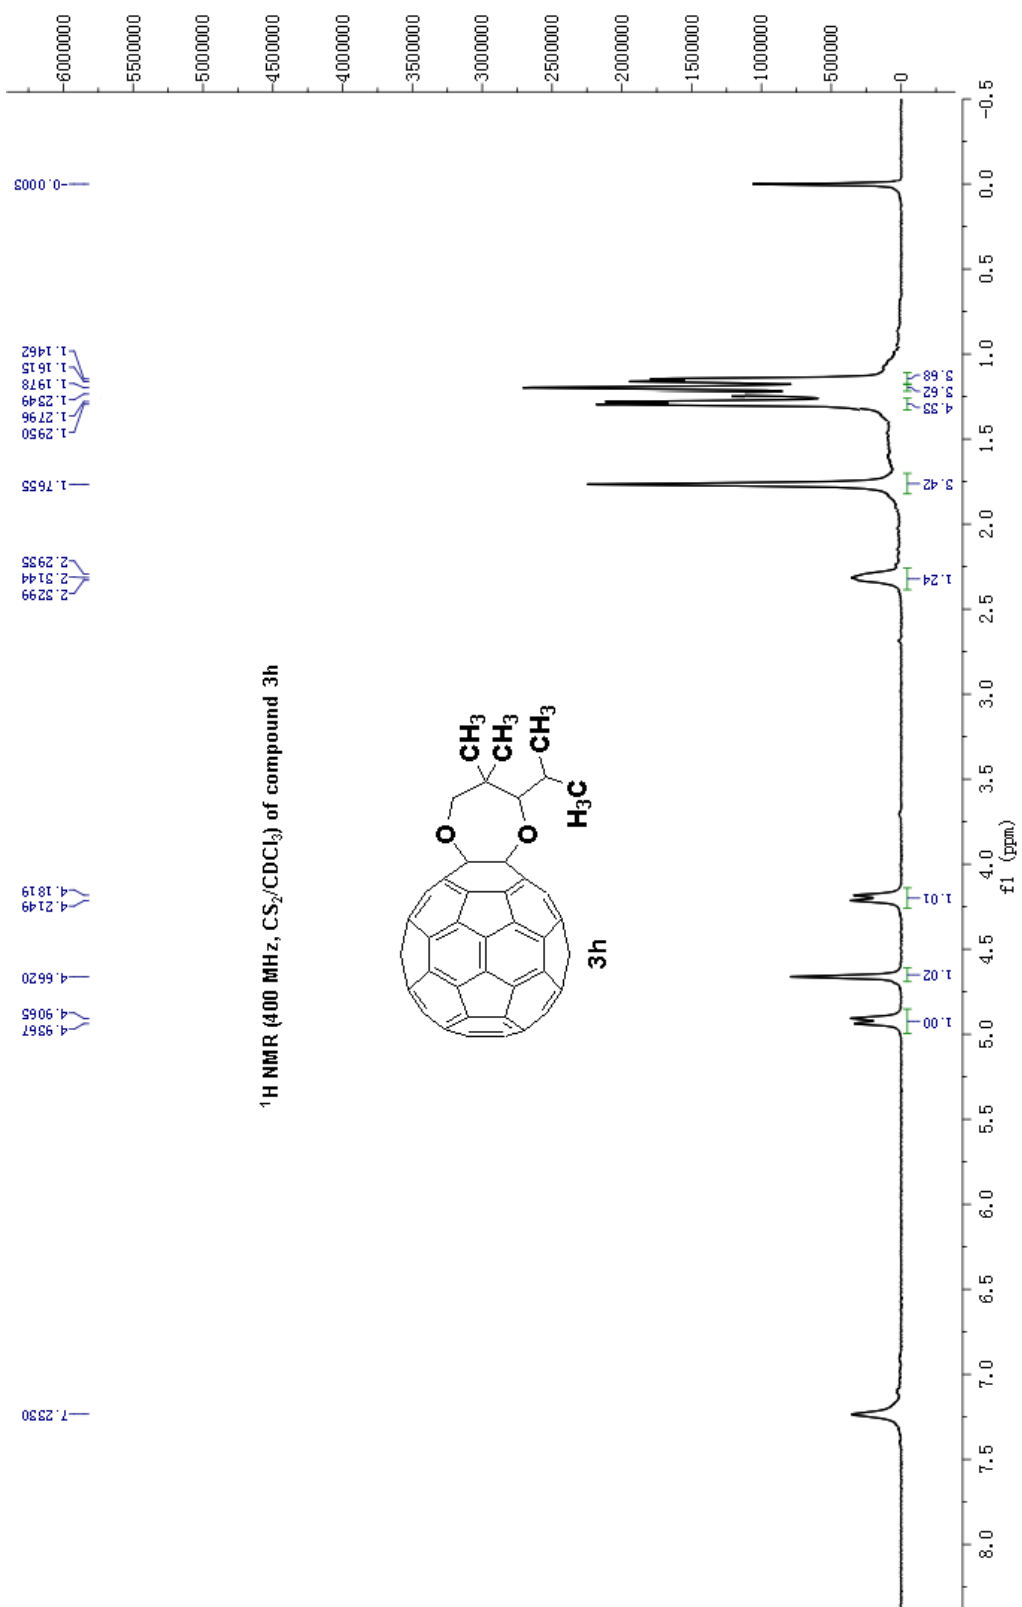

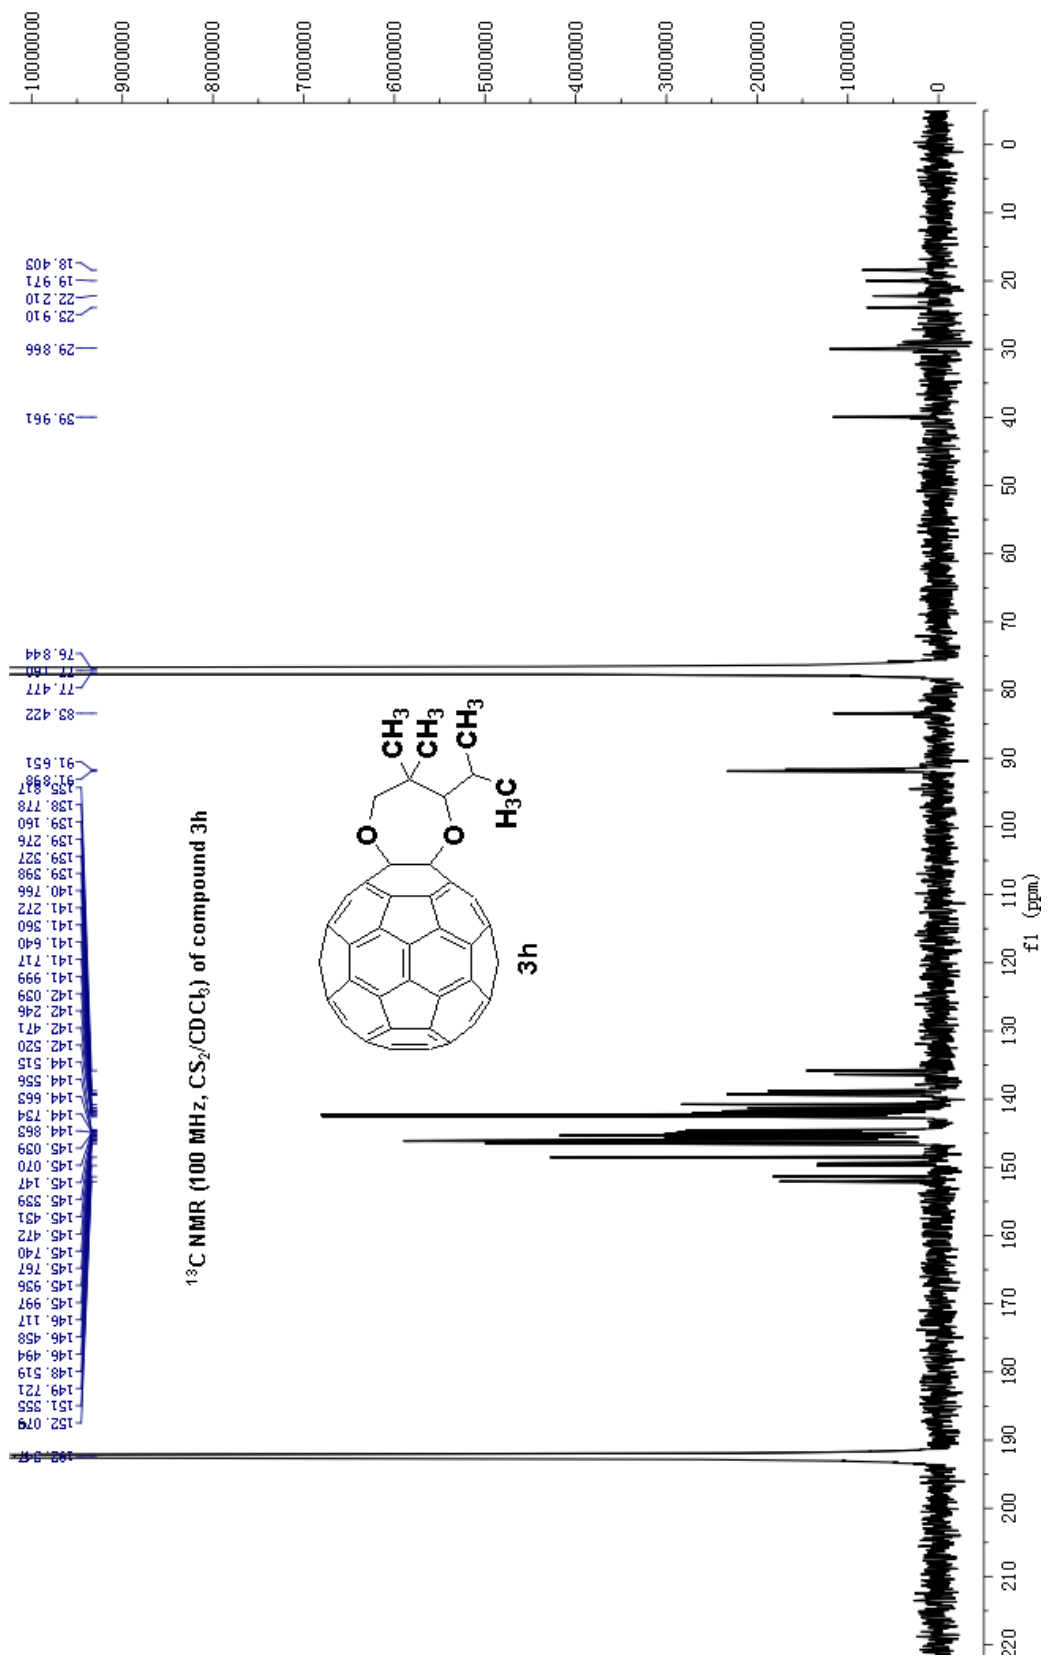

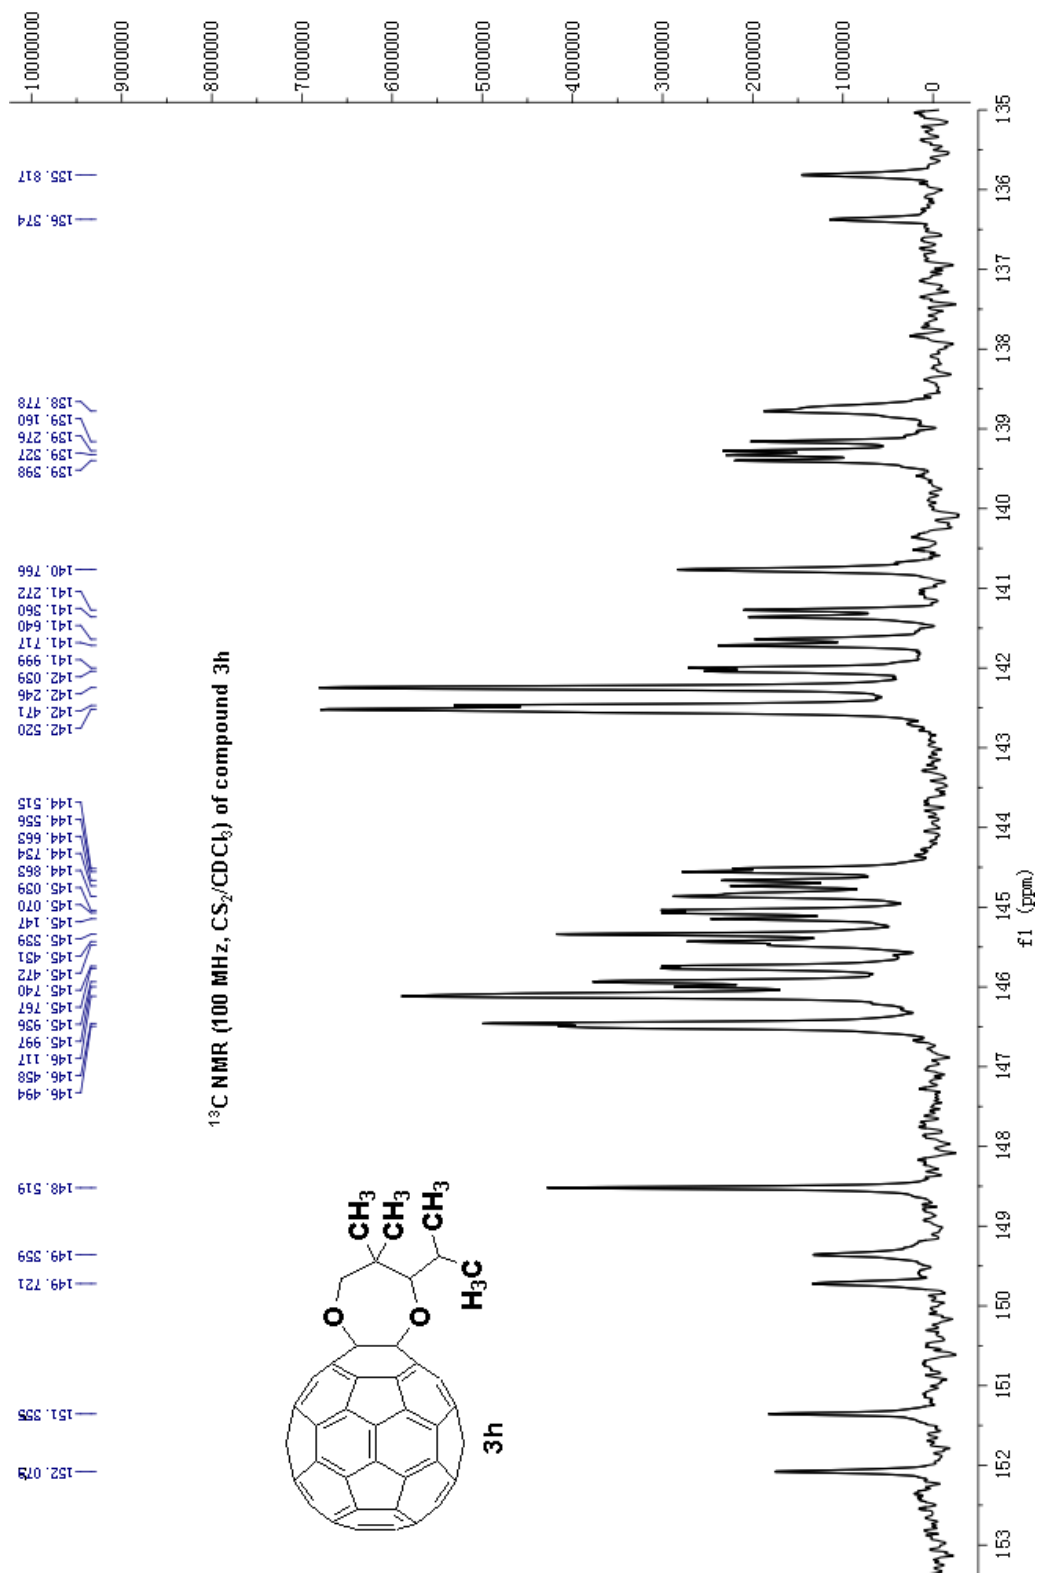

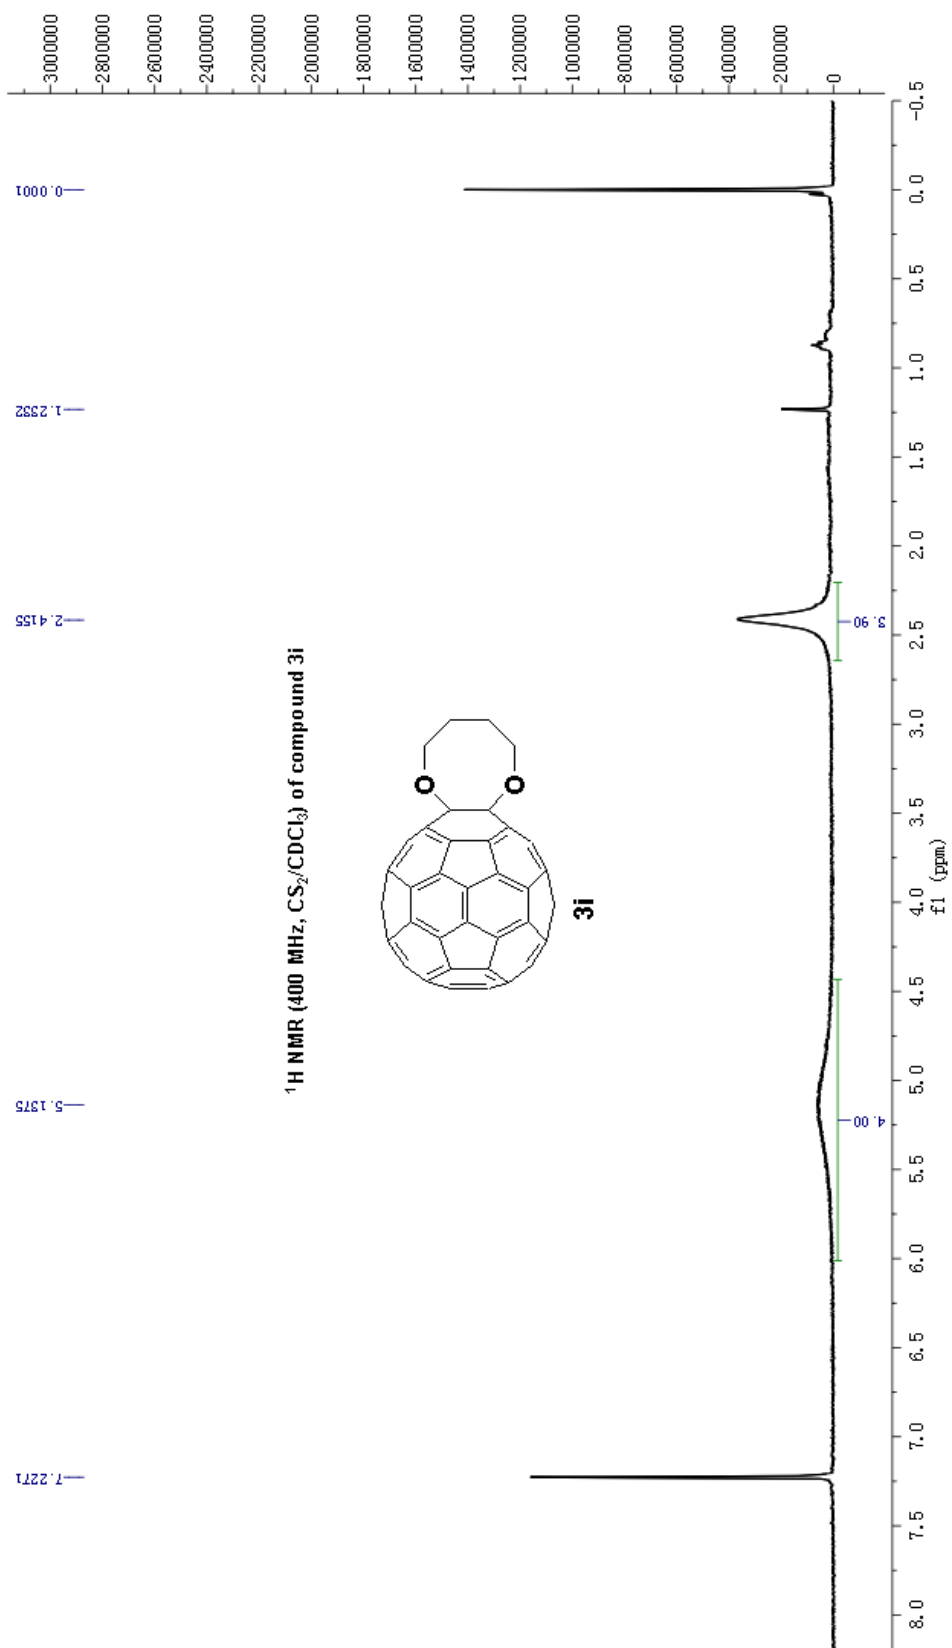

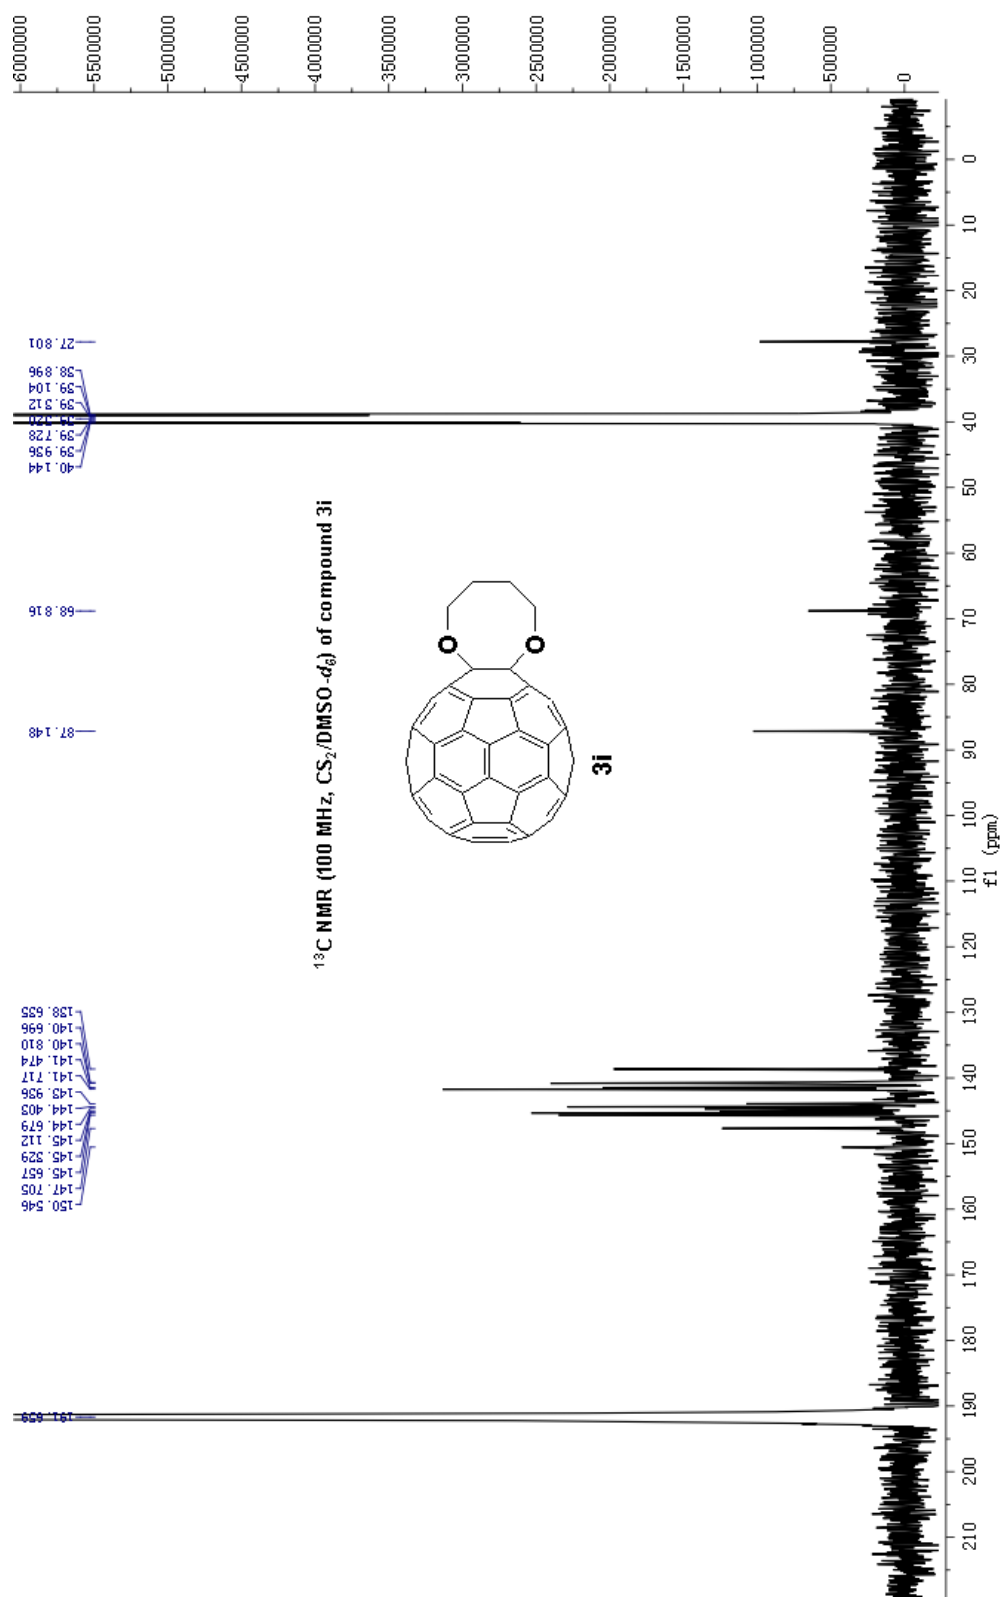



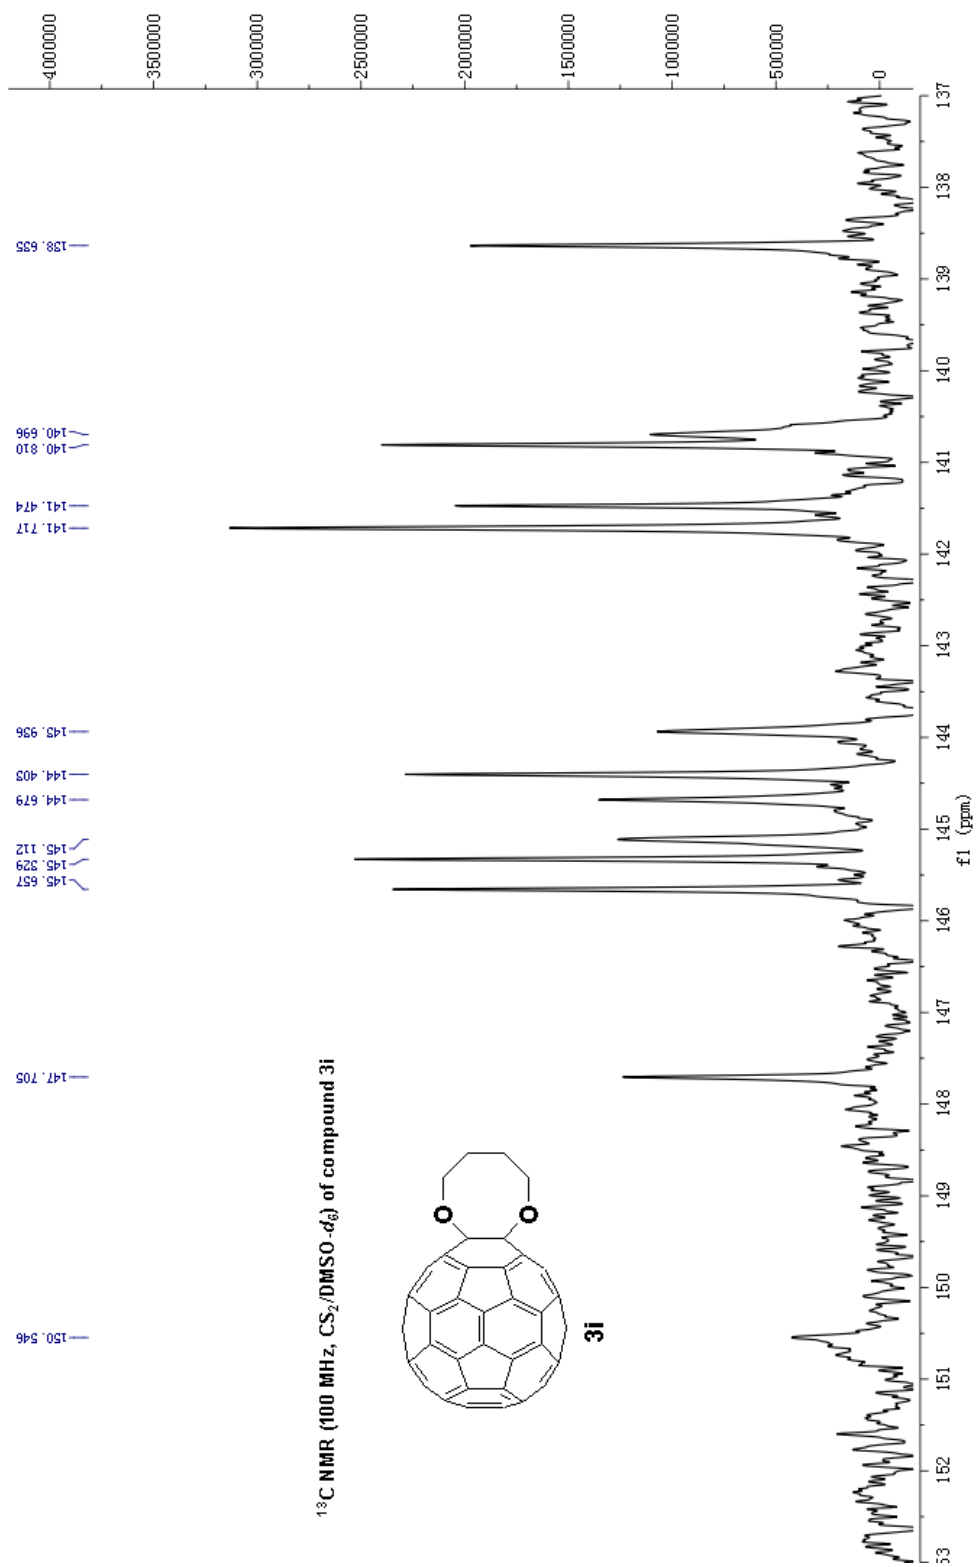

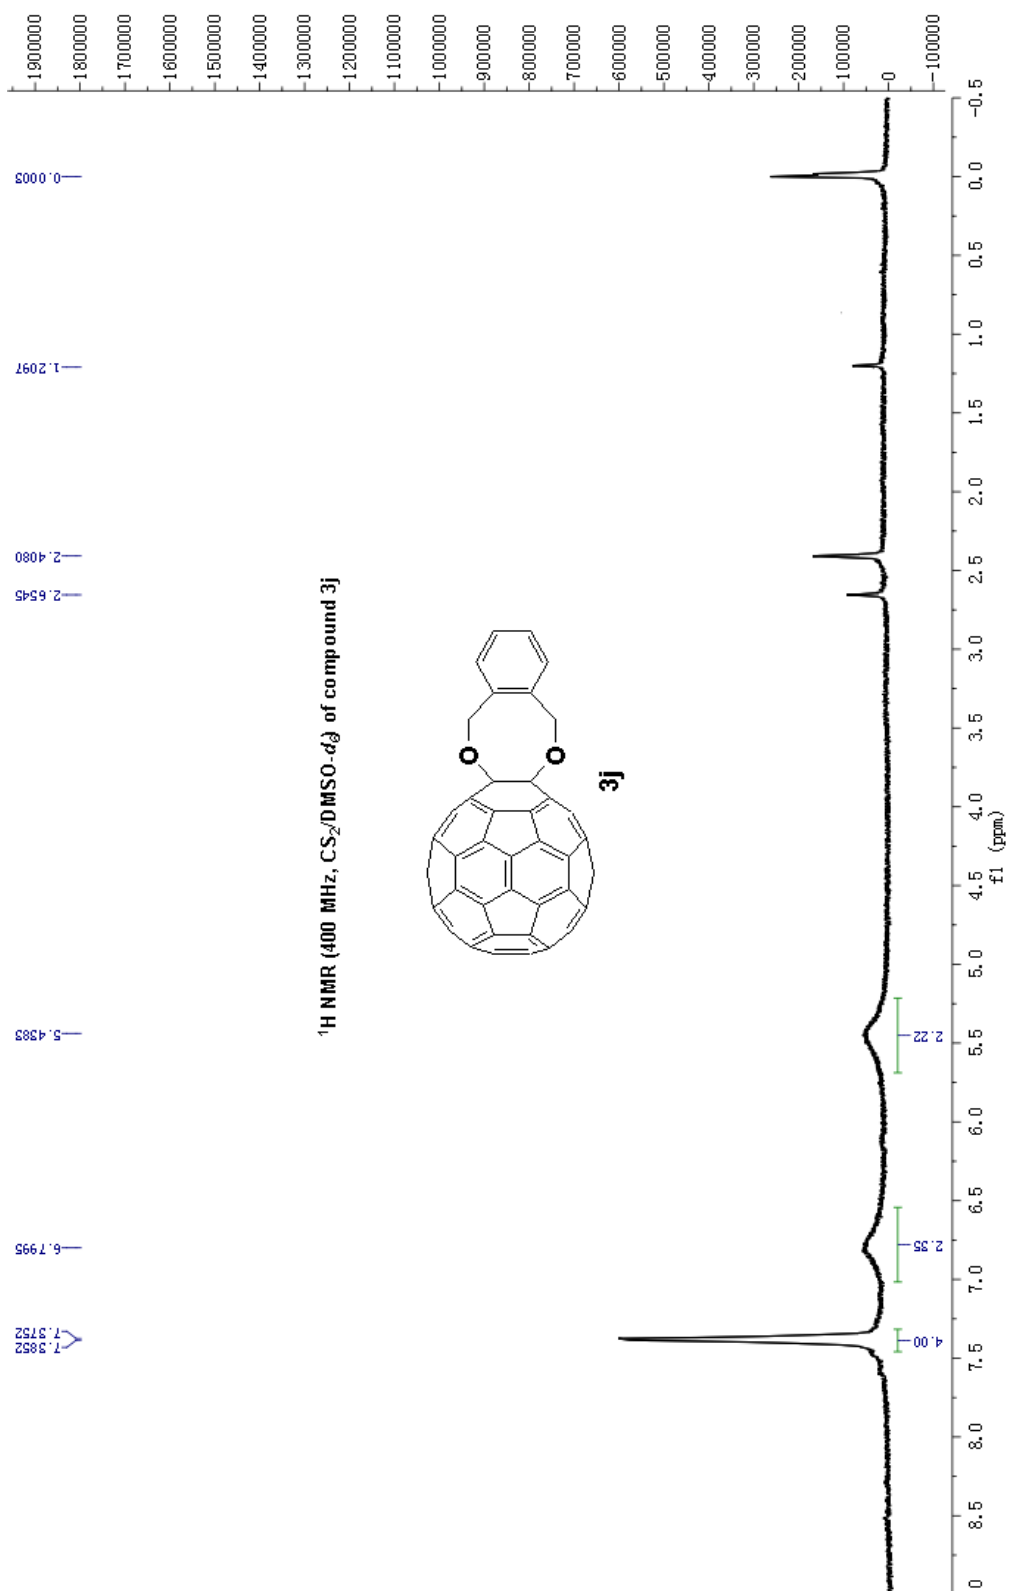

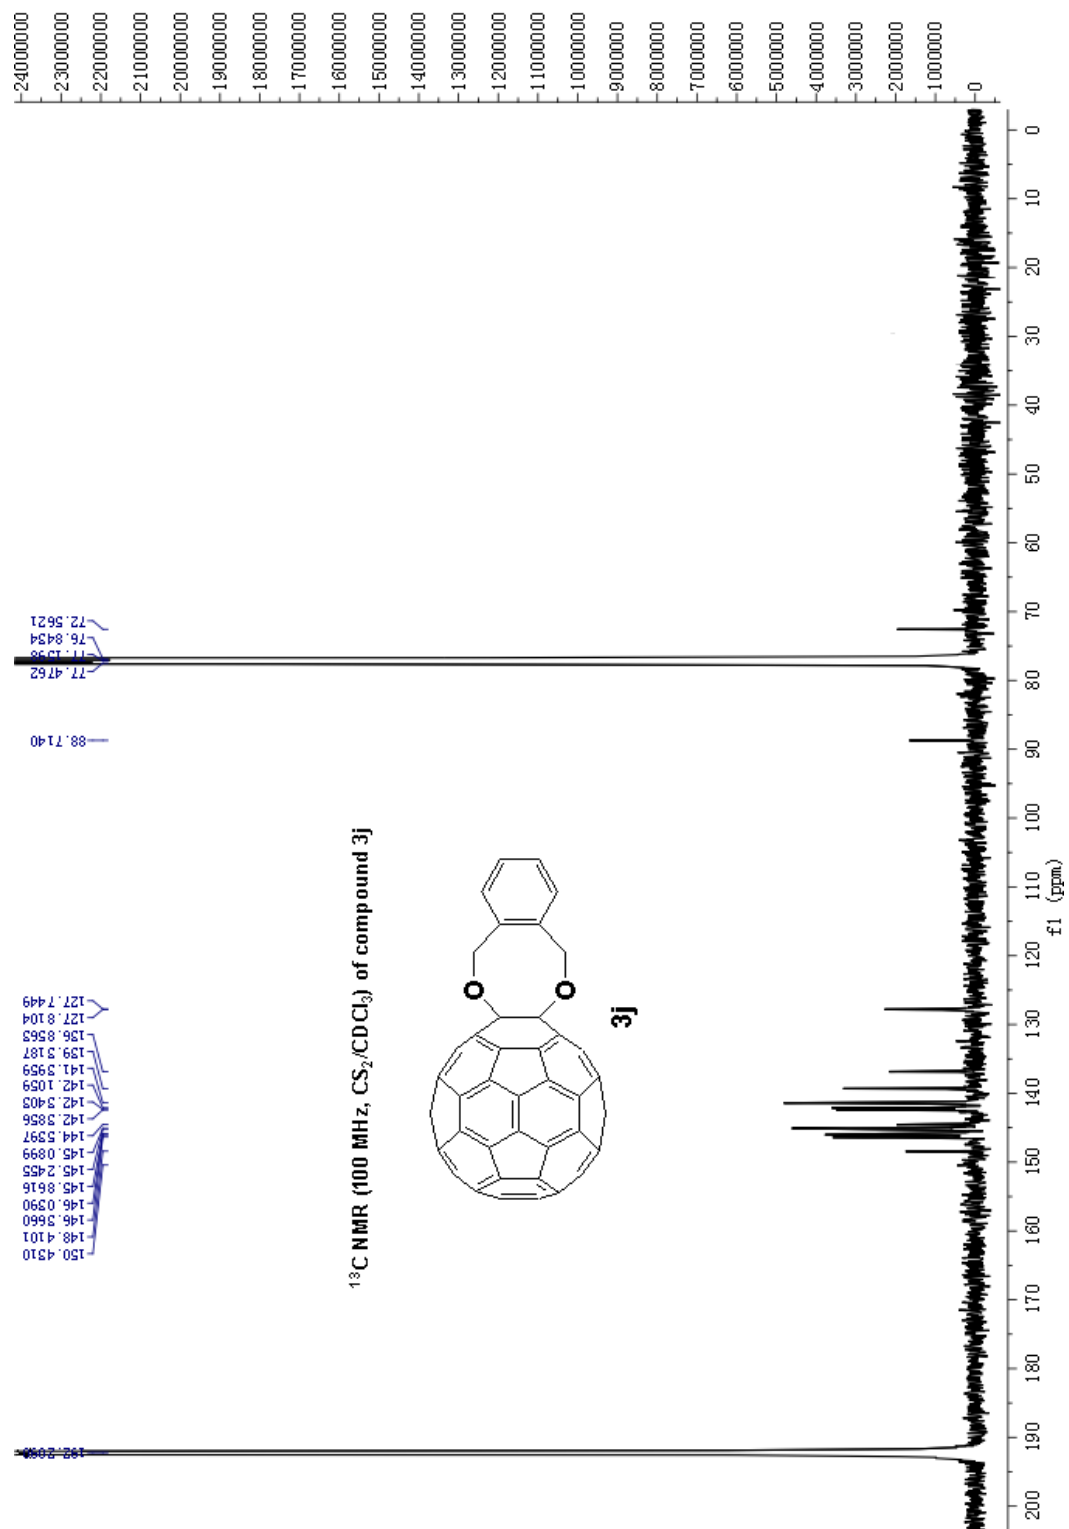

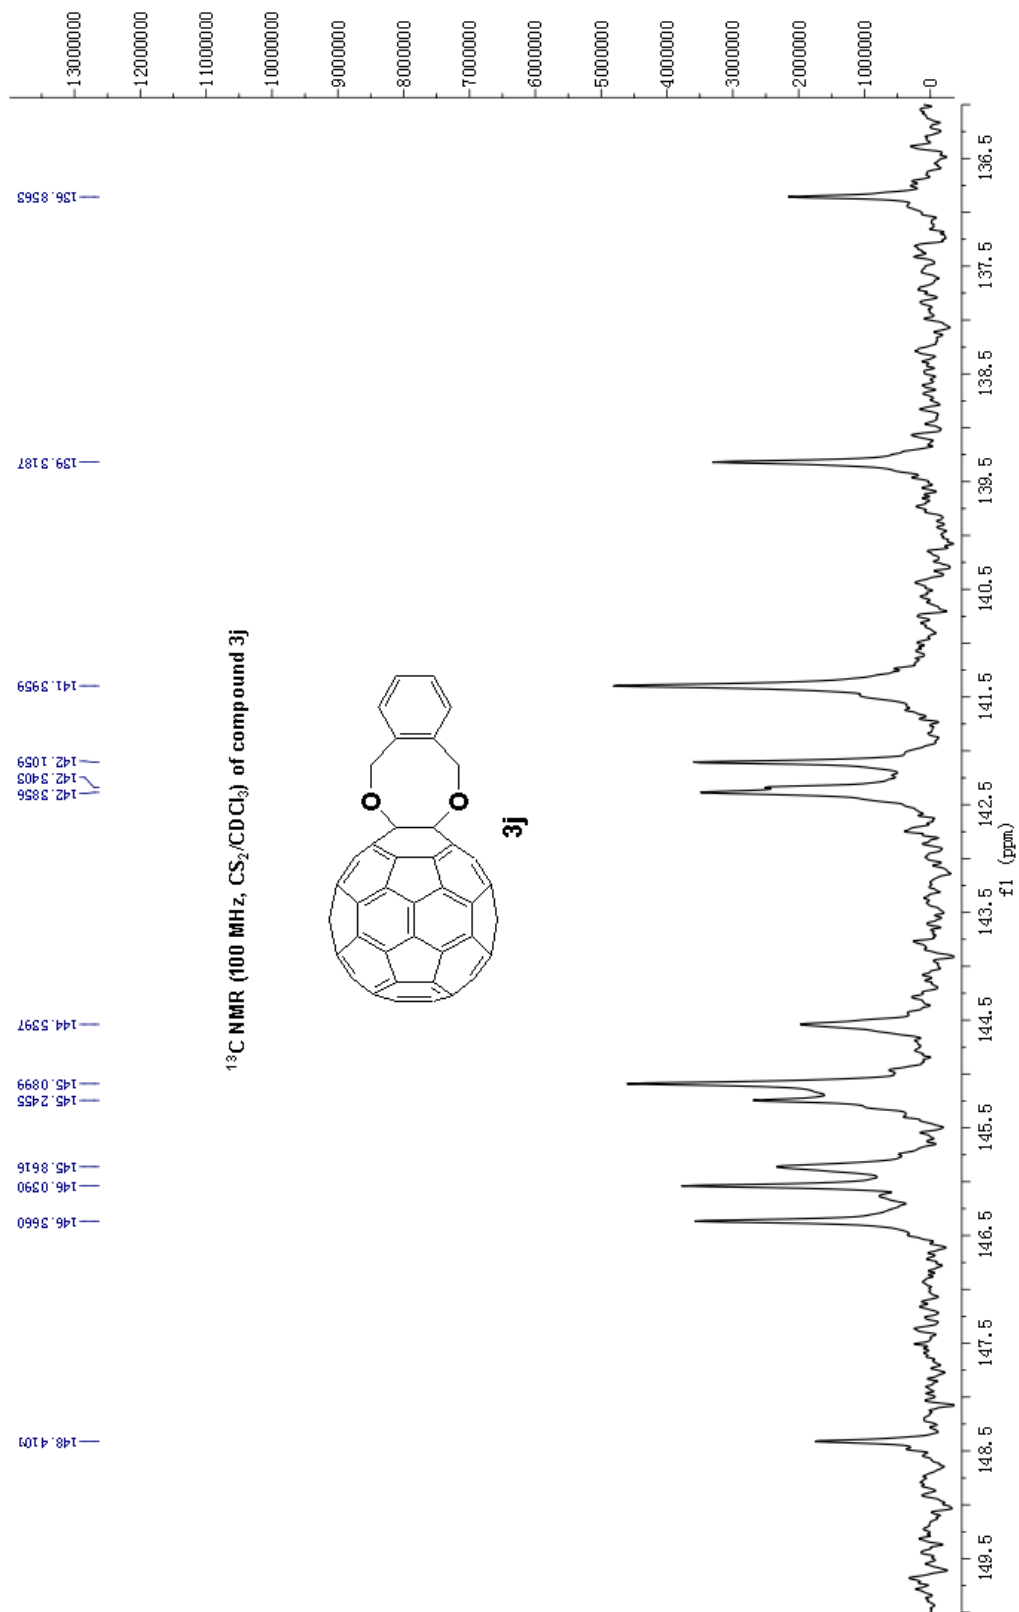

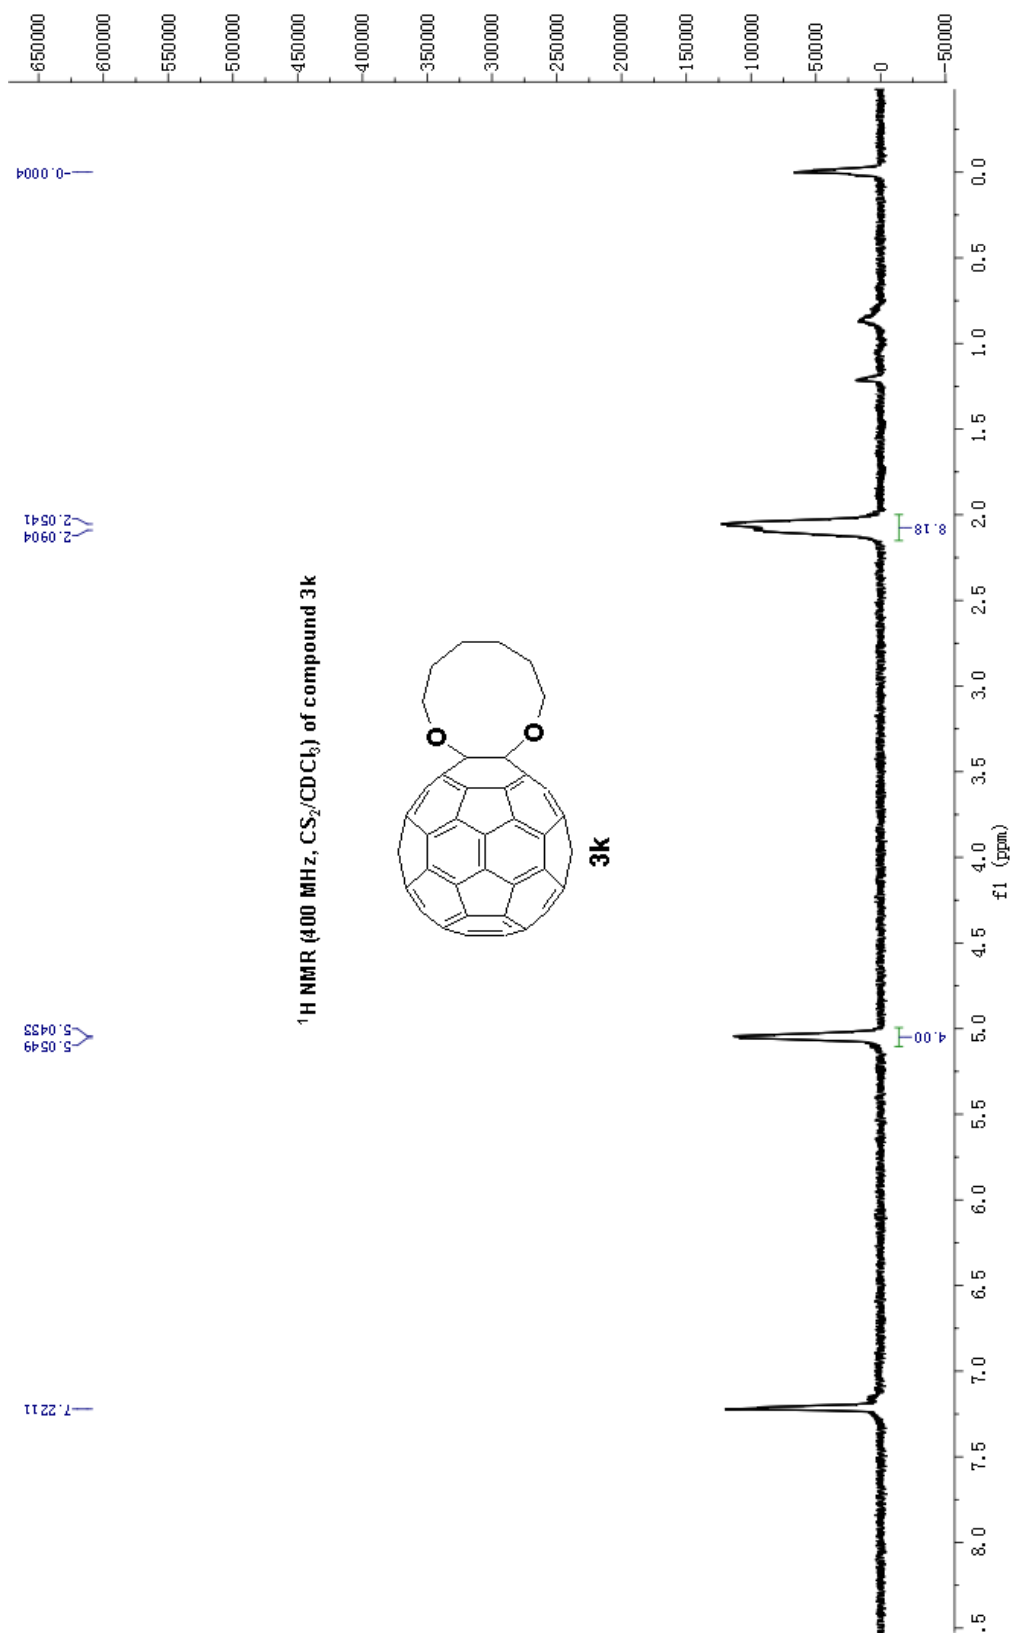

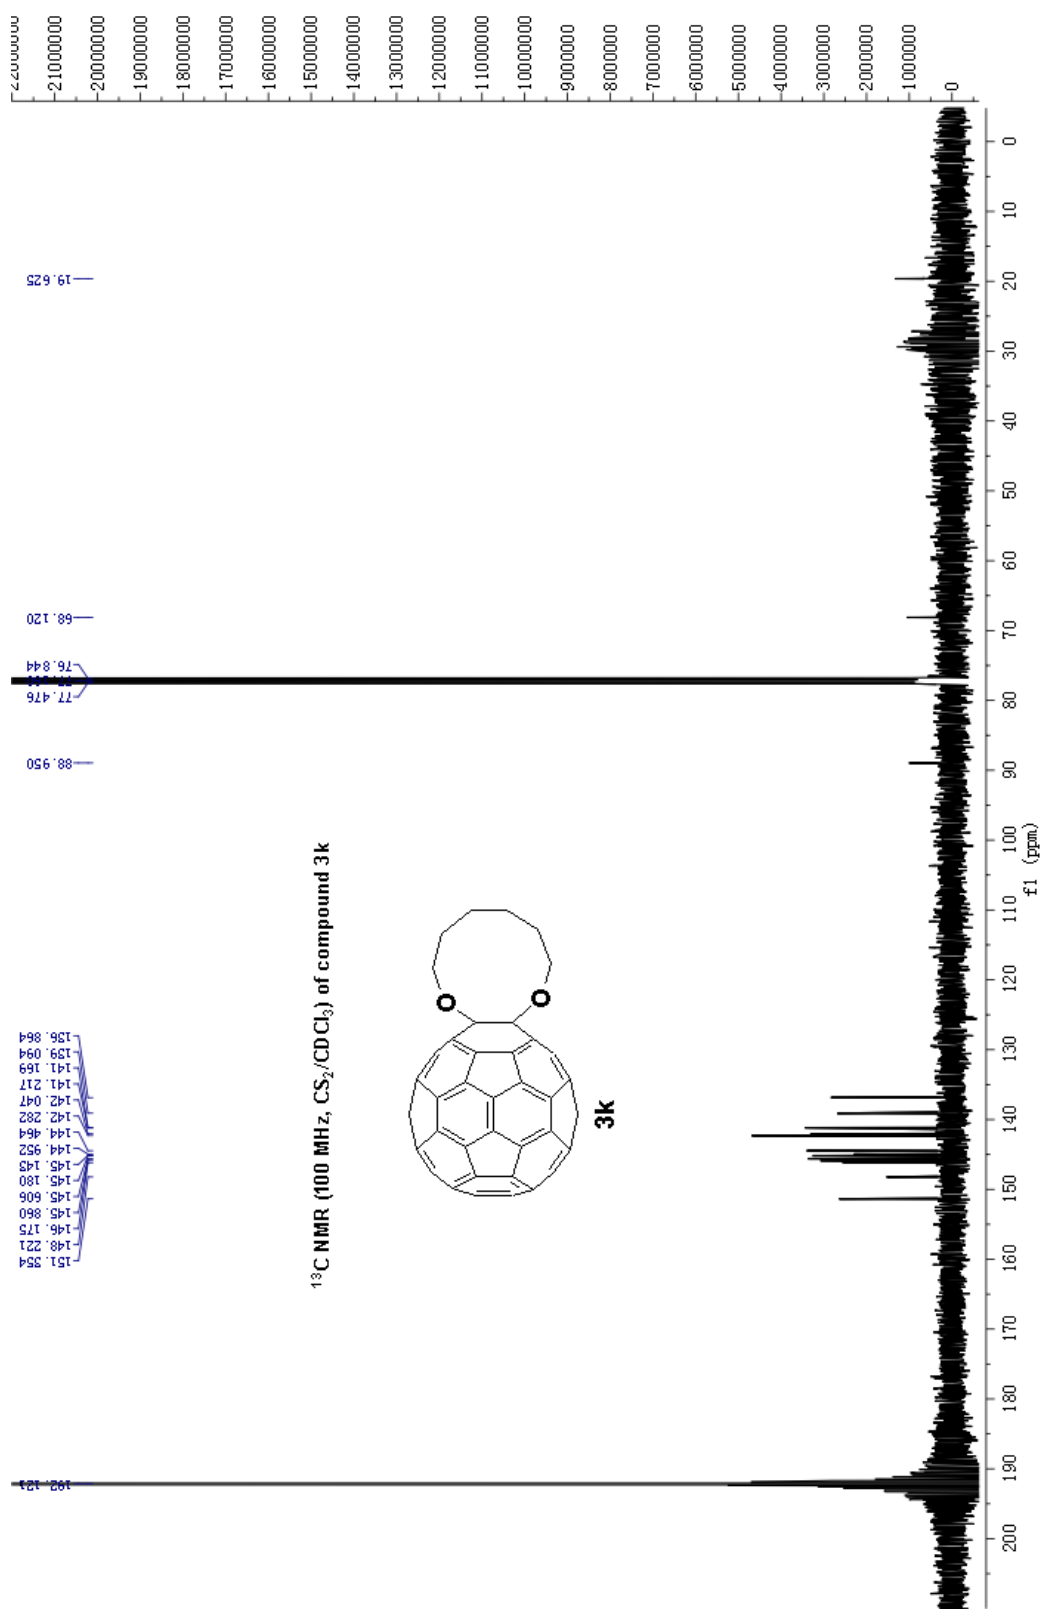

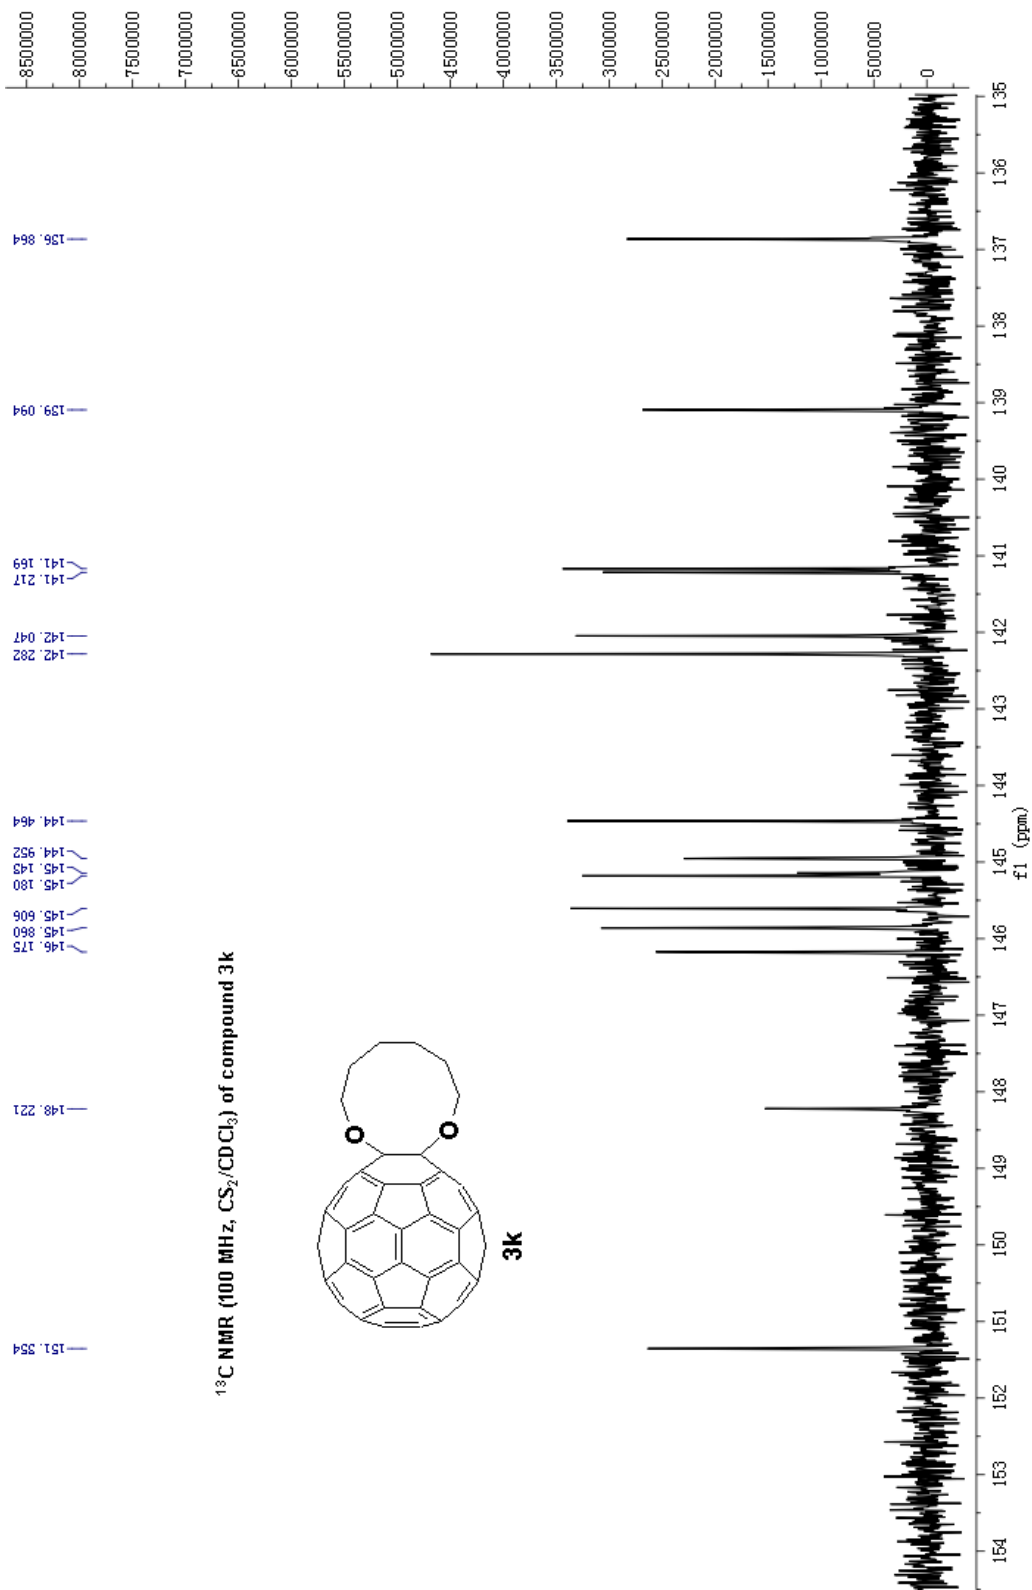

Supplement: c5ra03751d1.pdf [file c5ra03751d1.pdf]
